# Supplementary material for: Serious gaming during multidisciplinary rehabilitation for patients with complex chronic pain or fatigue complaints: study protocol for a controlled trial and process evaluation
Source: PubMed Central journal article supplement — BMJ Open. 2017 Jun 8;7(6):e016394. doi: 10.1136/bmjopen-2017-016394 (PMC5726107; doi:10.1136/bmjopen-2017-016394), 2017-06-08
Supplement: bmjopen-2017-016394.draft_revisions.pdf [file bmjopen-2017-016394.draft_revisions.pdf]

# BMJ Open

## Serious gaming during multidisciplinary rehabilitation for patients with complex chronic pain and fatigue complaints: study protocol for a controlled trial and process evaluation

|                                 |                                                                                                                                                                                                                                                                                                                                                                                                 |
|---------------------------------|-------------------------------------------------------------------------------------------------------------------------------------------------------------------------------------------------------------------------------------------------------------------------------------------------------------------------------------------------------------------------------------------------|
| Journal:                        | <i>BMJ Open</i>                                                                                                                                                                                                                                                                                                                                                                                 |
| Manuscript ID                   | bmjopen-2017-016394                                                                                                                                                                                                                                                                                                                                                                             |
| Article Type:                   | Protocol                                                                                                                                                                                                                                                                                                                                                                                        |
| Date Submitted by the Author:   | 13-Feb-2017                                                                                                                                                                                                                                                                                                                                                                                     |
| Complete List of Authors:       | Vugts, Miel; Tilburg University, Tranzo<br>Joosen, Margot; Tilburg University, Tilburg School of Social and Behavioral Sciences, Tranzo Scientific Center for Care and Welfare<br>Mert, Agali; Centra voor Integrale Revalidatie en Arbeidsactivering Nederland,<br>Zedlitz, Aglaia; Universiteit Leiden, Health, medical and neuropsychology<br>Vrijhoef, Hubertus; Tilburg University, Tranzo |
| <b>Primary Subject Heading</b>: | Rehabilitation medicine                                                                                                                                                                                                                                                                                                                                                                         |
| Secondary Subject Heading:      | Rheumatology, Research methods, Mental health                                                                                                                                                                                                                                                                                                                                                   |
| Keywords:                       | Rehabilitation medicine < INTERNAL MEDICINE, MENTAL HEALTH, PAIN MANAGEMENT, QUALITATIVE RESEARCH, Information technology < BIOTECHNOLOGY & BIOINFORMATICS                                                                                                                                                                                                                                      |
|                                 |                                                                                                                                                                                                                                                                                                                                                                                                 |

SCHOLARONE™  
Manuscripts

Only

1  
2  
3 Study Protocol  
4  
5

6 **Serious gaming during multidisciplinary rehabilitation for patients with complex chronic pain and**  
7 **fatigue complaints: study protocol for a controlled trial and process evaluation**  
8

9  
10 Miel A P Vugts MSc\*

11 Tilburg University, Tilburg School of Social and Behavioural Sciences, Tranzo Scientific Centre for Care  
12 and Welfare;  
13 Ciran Rehabilitation Centres, Venlo, the Netherlands  
14

15  
16  
17 Margot C W Joosen PhD

18 Tilburg University, Tilburg School of Social and Behavioural Sciences, Tranzo Scientific Centre for Care  
19 and Welfare  
20

21  
22 Agali Mert PhD

23 Ciran Rehabilitation Centres, Venlo, the Netherlands  
24

25  
26 Aglaia M E Zedlitz PhD

27 Leiden University, Department of Health Medical and Neuropsychology, Leiden Institute for Brain and  
28 Cognition  
29

30  
31 Hubertus J M Vrijhoef PhD

32 Tilburg University, Tilburg School of Social and Behavioural Sciences, Tranzo Scientific Center for Care  
33 and Welfare, the Netherlands;  
34

35 Maastricht University Medical Center, Department of Patient & Care, the Netherlands;

36 Vrije Universiteit Brussels, Department of Family Medicine, Belgium  
37  
38

39 \*Corresponding author: Miel A P Vugts MSc. PhD Candidate, Tilburg University, Tilburg School of  
40 Behavioural Sciences, Tranzo, P.O. Box 90153, Tilburg 5000 LE, The Netherlands. Tel: +31 13 466  
41 8271; e-mail: [m.a.p.vugts@tilburguniversity.edu](mailto:m.a.p.vugts@tilburguniversity.edu)  
42  
43

44 KEYWORDS: Chronic pain, functional somatic syndrome, serious gaming, multidisciplinary rehabilitation  
45  
46

47 Version 1.0 (10/02/2017)

48 Number of words: 3986  
49  
50  
51  
52  
53  
54  
55  
56  
57  
58  
59  
60

**ABSTRACT****Introduction:**

Many individuals suffer from chronic pain or functional somatic syndromes and face boundaries for diminishing functional limitations by means of bio-psychosocial interventions. Serious gaming could complement current interventions through enjoyment and independent accessibility. A study protocol is presented for studying whether, how, for which patients, and under what circumstances serious gaming improves patient health outcomes during regular multidisciplinary rehabilitation.

**Methods and analysis:**

A mixed-methods design is described that prioritizes a 2-armed naturalistic quasi-experiment. An experimental group is composed of patients who follow serious gaming during an outpatient multidisciplinary programme at two sites of a Dutch rehabilitation centre. Control group patients follow the same programme without serious gaming in two similar sites. Multivariate mixed modelling analysis is planned for assessing how much variance in 220 complete records of routinely monitored pain intensity, pain coping and cognition, fatigue, and psychopathology outcomes is attributable to serious gaming. Embedded qualitative methods include unobtrusive collection and analyses of stakeholder focus group interviews, participant feedback, and semi-structured patient interviews. Process analyses are carried out by a systematic approach of mixing qualitative and quantitative methods at various stages of the research.

**Discussion:**

Study validity might be limited by a lack of randomized participant sampling and treatment allocation. However, realist evaluation principles and mixed-methods used may enhance future assessment of serious gaming effects across patients and health care settings.

**Ethics and dissemination:**

The Ethics Committee of the Tilburg School of Social and Behavioural Sciences approved the research after reviewing the protocol for the protection of patients' interests in conformity to the letter and rationale of the applicable laws and research practice (EC 2016.25t).

**Trial registration:**

A protocol for the naturalistic quasi-experimental outcome evaluation was entered in the Dutch trial register (NTR6020).

**ARTICLE SUMMARY****Article focus**

- Describe a protocol for a naturalistic quasi-experiment with embedded mixed-methods for evaluating if, when, and how serious gaming improves health outcomes during multidisciplinary rehabilitation in a regular health care setting.
- Pain intensity, pain coping and cognition, fatigue, and psychopathology are primary patient outcomes.

**Key messages**

- Serious gaming may be complementary in enhancing the accessibility and/or effectiveness of bio-psychosocial interventions.
- Health outcomes of a serious game intended for behavioural change (LAKA) are evaluated for the first time in patients with chronic pain or functional somatic syndromes.

- 1  
2  
3 - Complication of intervention effects can be addressed by means of realist evaluation principles and  
4 mixed-methods.  
5

6 **Strengths and limitations of this study**

- 7 - The novelty of the intervention and study methods is a strength.  
8  
9 - Using a pragmatic approach to study serious gaming when deployed in a regular health care setting  
10 enables to understand under what conditions serious gaming will (not) work.  
11  
12 - Study limitations come with the naturalistic design, due to pragmatic reasons, that prevents random  
13 treatment assignment and stringent diagnostic methods.  
14  
15  
16  
17  
18  
19  
20  
21  
22  
23  
24  
25  
26  
27  
28  
29  
30  
31  
32  
33  
34  
35  
36  
37  
38  
39  
40  
41  
42  
43  
44  
45  
46  
47  
48  
49  
50  
51  
52  
53  
54  
55  
56  
57  
58  
59  
60

## INTRODUCTION

### Background and rationale

Video games are vividly debated to their behavioural and clinical outcomes, which may be negative or positive depending on game content and player attributes.<sup>1 2</sup> Serious (health) games primarily target promotion of health benefits.<sup>3</sup> A new serious game, called LAKA, aims to facilitate patient learning about living with complex chronic somatic complaints.<sup>4</sup> Based on the results of a feasibility study, LAKA is deployed in a regular health care setting, as an additional component of outpatient multidisciplinary rehabilitation. The current protocol presents an innovative mixed-methods study for gaining insight into the effectiveness of serious gaming as a complementary modality during regular multidisciplinary rehabilitation.

Using a variety of definitions and measures of pain and disability, the worldwide prevalence estimates for chronic pain range between 7% and 64%.<sup>5-9</sup> Individuals are in chronic pain (CP) when complaints persist beyond the usual 3 to 6 months of organic recovery.<sup>10</sup> Functional somatic syndromes (FSS) are diagnosed in individuals that seek medical help for functional disturbance and chronic somatic symptoms without a satisfactory explanation by organ pathology or disease.<sup>11</sup> CP and FSS may have a biological explanation in central nervous system sensitization.<sup>12 13</sup> Predisposition to these disorders is probably determined by a combination of genetic factors and personality characteristics.<sup>14 15</sup> Symptom patterns are often precipitated by trauma or social factors.<sup>16-18</sup> Maladaptive thoughts, feelings, and behaviour are assumed to maintain the symptoms.<sup>17 19-21</sup> Regarding treatment, support has been found for a stepped care approach with active bio-psychosocial treatment when unimodal treatments are insufficient.<sup>17</sup> Unfortunately, only small long-term improvements have been found in low back pain patients with severe and long-lasting pain and disability.<sup>17 22</sup> Recent research addresses 'matching' and 'blending' therapeutic strategies and delivery modes. As such treatment access, reach, adherence and effectiveness could be enhanced.<sup>23 24</sup>

Serious gaming could be of aid here. Previously investigated strategies are exergaming to improve motivation for physical activity,<sup>25</sup> 'brain training games' against dullness in the remediation of cognitive functions,<sup>26</sup> 'virtual reality' for safety in graded activity or exposure,<sup>27</sup> and 'health behaviour gaming' for fun while addressing behavioural antecedents.<sup>3</sup> In the fields of rehabilitation and pain management, virtual environments have shown promise in reducing acute pain by distraction, or in activity management to restore physical functioning.<sup>28 29</sup> Outcome improvement after computer-based treatment in CP or FSS patients may be mediated by changes in beliefs (about illness, control, fear avoidance), coping (catastrophizing, psychological inflexibility), or mood.<sup>30 31</sup> It is plausible that features of a health behaviour game such as interactivity, storytelling, simulation, sound effects and visuals can be leveraged for behavioural change.<sup>3 32</sup> If game tasks correspond with an intended piece of knowledge and/or skill, learning may benefit from immersion, and intrinsic motivation.<sup>32-34</sup> Studying how such gaming mechanisms affect treatment may help to understand variation in outcomes and aid in design improvement.

However, within the outcome evaluation of multidisciplinary interventions several complicating factors arise. These consist of the multidimensionality<sup>35</sup> and dependency on implementation in actual health care settings.<sup>36</sup> In other words, characteristics at the levels of organization, care providers, patients and interventions all affect outcome levels.<sup>37 38</sup> Therefore, ideally, multiple sources of information are used to evaluate to what extent, for whom, when and under what circumstances an

1  
2  
3 innovation of multidisciplinary treatment improves outcomes in patients with CP or FSS.<sup>39 40</sup> For  
4 example, some intervention studies show different outcomes of a computer delivered therapy when  
5 applied in different countries.<sup>41</sup> Likewise, serious gaming outcomes may vary according to whether,  
6 when, and how 'debriefing' is delivered to exploit game-play experiences for learning outcomes.<sup>42</sup>  
7 Debriefing can be offered via software or professional support via chat, e-mail, or face-to-face in groups  
8 or individually. Indeed, more adequately powered clinical trials are needed.<sup>2 3 43</sup> Moreover, pragmatic  
9 trials and realist evaluation principles are needed to determine how serious gaming relates to patient  
10 outcomes depending on how it is deployed in actual health care settings.

### 15 **Study aims**

16 Here we describe the protocol for outcome and process evaluations of complementary serious gaming  
17 during regular multidisciplinary rehabilitation for patients with CP or FSS, which holds three study aims.

18 The first aim is to investigate the effectiveness of serious gaming as a treatment complement.  
19 We question to what extent multidisciplinary rehabilitation with an additional serious gaming  
20 component is more effective than multidisciplinary rehabilitation without serious gaming for symptom  
21 reduction and clinically relevant improvement. Primary outcomes are pain intensity, pain coping and  
22 cognition, fatigue complaints, anxiety and depression. Secondary outcomes are patients' impression of  
23 overall improvement, general subjective health, and satisfaction with functioning and treatment.

24 Secondly, we aim to understand which organization, provider, patient, and/or innovation level  
25 factors influence the outcomes of serious gaming for patients. Innovation level factors concern serious  
26 gaming features. Patient level facilitators or barriers could be demographic, health status and (co-)  
27 intervention history factors. Serious gaming outcomes could also depend on complex provider  
28 behaviour by attitude, skill, and/or time constraints. Finally, outcomes of serious gaming could be  
29 influenced by its organization in a clinical setting. Therefore, we pose the question: what are the barriers  
30 and facilitators of outcome improvement through serious gaming according to patients, providers, and  
31 other stakeholders? Furthermore, we question how variation in serious gaming outcomes can be  
32 decomposed with plausible patient level differences and/or delivery conditions within the treatment  
33 setting (i.e. size of a debriefing group).

34 The third aim concerns *how* serious gaming contributes to patient outcomes. For this, we  
35 explore various serious gaming mechanisms, being the subjective experiences and objective  
36 performances in context that may affect health outcomes. In addition, plausible linear effects between  
37 mechanisms and patient outcome variables are investigated. Achievement of all three research aims will  
38 inform the further development of a valid and practical programme theory of serious gaming outcomes  
39 in regular health care for patients with CP or FSS.

## 49 **METHODS AND ANALYSIS**

### 50 **Study design and procedure**

51 An embedded experimental mixed-methods design is created by an integrated multidisciplinary  
52 research team (MV, HV, MJ, AZ, AM) to address all three research aims in a single study (see figure 1).  
53 For studying the first research aim, which is to estimate patient level outcome improvement due to  
54 serious gaming during regular outpatient rehabilitation, a two-armed naturalistic quasi-experiment is  
55 prioritized (displayed at the centre of figure 1). A serious gaming intervention is deployed, for usage by  
56  
57  
58  
59  
60

all patients, at two sites of a Dutch outpatient rehabilitation clinic. Therefore, an intervention group is constituted of patients who receive the multidisciplinary rehabilitation programme with an additional serious gaming intervention. The control group consists of patients who simultaneously follow the same programme in two similar sites of the same clinic without serious gaming. Codified quantitative data from patient records will be retrieved and analysed to examine between group outcome differences. The protocol for the naturalistic quasi-experiment was entered in the Dutch trial register (NTR6020).

Figure 1: Overview of the Mixed-Methods design

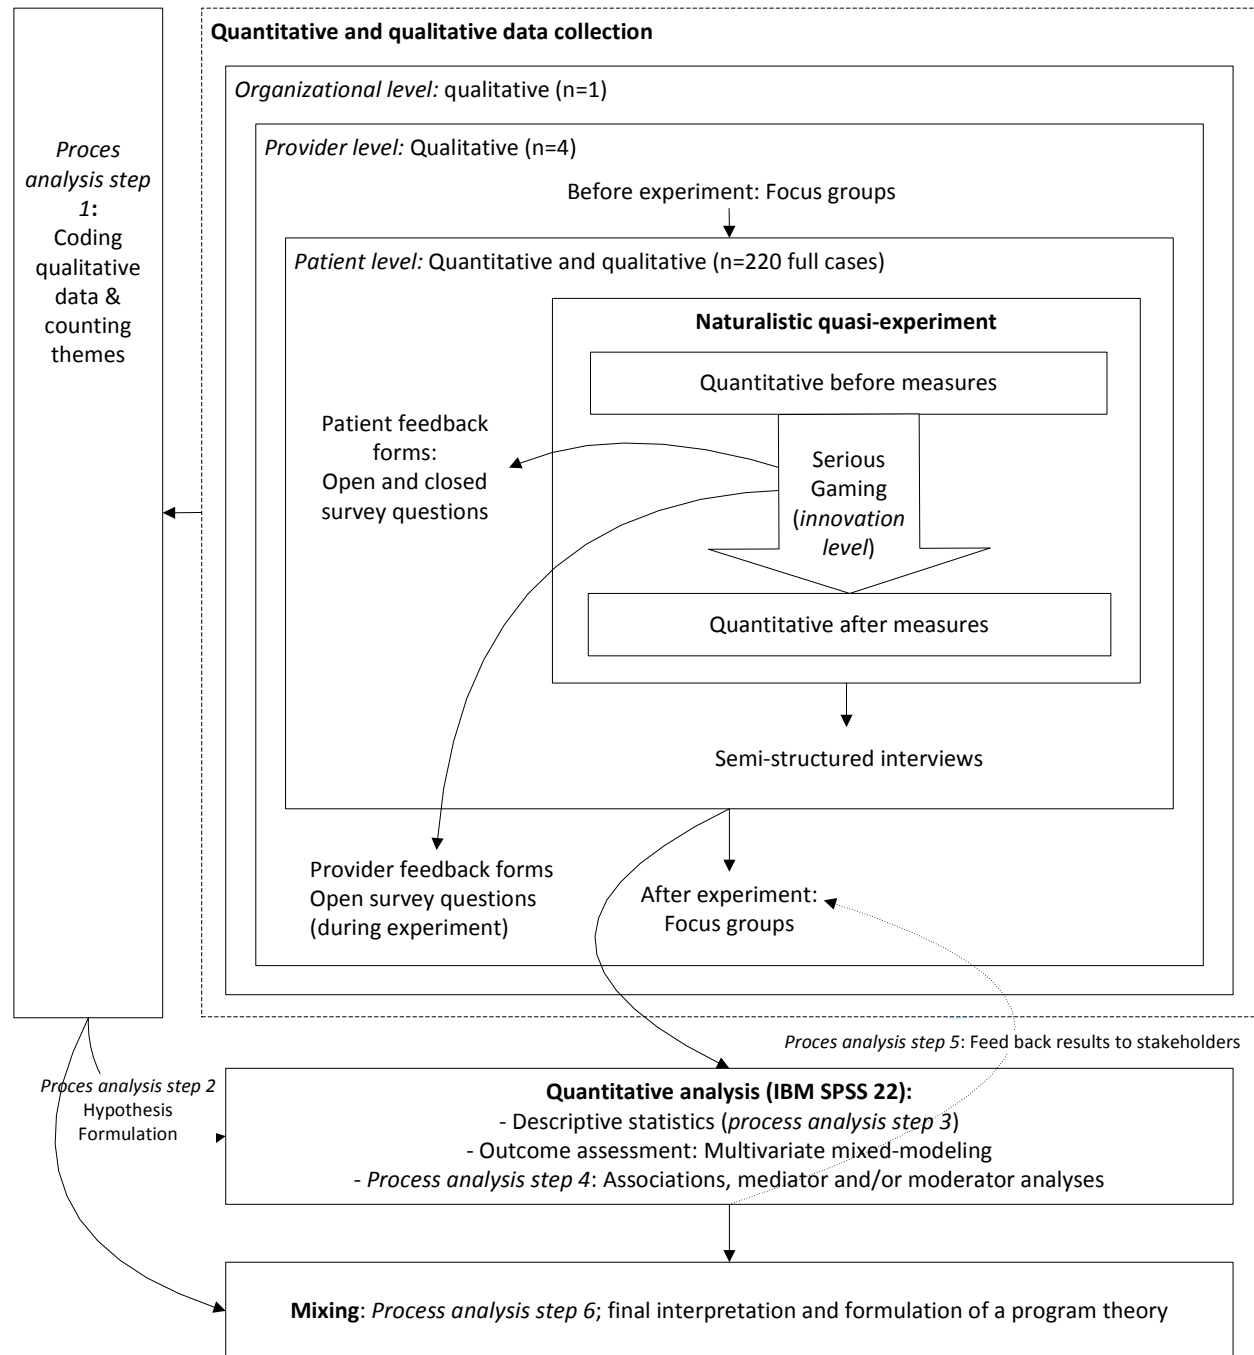

1  
2  
3 Embedding qualitative methods before, concurrently to, and after the quasi-experiment suits our  
4 second and third study aims. This mixed-method design is ideal for examining intervention processes,  
5 understanding mechanisms related to variables, and supporting programme theory development.<sup>44</sup>  
6 Herein, no intermediate qualitative results are communicated with providers and implementers during  
7 the experiment. Data collection started in April 2016 and is planned to end in March 2017, quantitative  
8 outcome data will be retrieved when concurrently collected qualitative data are analysed (February  
9 2017).

## 14 Recruitment

### 15 Sites and professionals

16 Two intervention sites where serious gaming is deployed participate in the study. For the recruitment of  
17 control subjects, two other sites (out of 18 sites as part of the same treatment centre) are selected  
18 based on similarity with regard to patient characteristics, facilities, protocols, history, personnel,  
19 location in or near a city in the southern Netherlands, and the absence of disruptive events planned  
20 during the intervention period. The treatment centre provides rehabilitation care covered by health  
21 insurance in association with a university medical centre. Professional study participants are local  
22 stakeholders of serious gaming, including experts, implementers, and providers.

### 27 Patients

28 Patient candidates received an indication of eligibility for outpatient multidisciplinary rehabilitation from  
29 a rehabilitation physician, and completed half of their rehabilitation programme at a participating site.  
30 Physician indications of eligibility are followed, which are based on the results of diagnostic surveys,  
31 physical and psychological investigations, and clinical interviewing via teleconference. Accordingly,  
32 patient participant inclusion criteria are: being between 18 and 67 years of age, reporting the presence  
33 of pain for more than 6 months, or fatigue complaints or a musculoskeletal disease for more than 3  
34 months, having no (more) indication for another (cost-) effective medical treatment, and have  
35 concomitant psychosocial problems. Patients are excluded from participation if: psychiatric symptoms  
36 are not adequately controlled, there is significant risk of psychological decompensation through a  
37 rehabilitation treatment, language or communication problems make it impossible to follow  
38 rehabilitation, and/or demonstrable inability to change behaviour (due to personality disorders, third  
39 party liabilities, or otherwise). An information letter, consent form, and verbal explanation are provided  
40 by local care providers. The recruitment process is monitored to ensure that all candidates are invited.

## 47 Interventions

### 48 Multidisciplinary rehabilitation programme

49 The outpatient multidisciplinary rehabilitation programme includes common bio-psychosocial  
50 approaches, and incorporates a focus on well-being and participation.<sup>45</sup> The standardized 16-week  
51 programme consists of on average 95 hours of individual or group sessions that are organized in  
52 modules and assigned in accordance with individual care needs. Each patient is treated by a team of two  
53 physiotherapists and two registered master's degree psychologists. Psychotherapeutic techniques  
54 include Cognitive Behavioural Therapy and psychodynamic approaches. For all patients, treatment  
55 contains rationales, goal setting and feedback, social support, exposure treatment, behavioural  
56  
57  
58  
59  
60



repetition and substitution, skills training (in relaxation, social skills, and meditation), and identity development techniques. Allocation of cognitive restructuring, eye movement desensitization (EMDR), and an intensive 2-day well-being course depend on screening results for psychopathological symptoms<sup>46</sup> and fear avoidance beliefs,<sup>47</sup> post-traumatic stress, and psychological well-being.

## Serious gaming

### *Theory and change techniques of the serious game LAKA*

Developer assumptions for the game LAKA have been documented throughout development and related to conceptual frameworks (see appendix).<sup>48</sup> Serious gaming is proposed to promote practice for well-being improvement, and for identifying and diminishing distortions and biases of self. This may be helpful for patients with CP or FSS in reducing the burden of their symptoms.<sup>49</sup> Based on a review of information about the design rationale, functionality, validity proof (before outcome evaluation), and data protection measures of LAKA, an independent jury awarded 3 out of 5 attainable stars for quality (see appendix).<sup>50</sup>

The serious game LAKA promotes practice through an Avatar model. Before the game starts, participants are invited to identify with an Avatar of their chosen gender and name (table 1). The storyline introduces an Avatar who recently experienced physical and social deterioration, senses an urgency to change, and engages in a trip around the world to learn about 'the art of living'. Player tasks are: to explore and select virtual action plans for 'encounters' with non-playing characters, to evaluate their 'satisfaction' about chosen actions, and to perform skills training in focused attention and open monitoring meditation exercises.<sup>51</sup> Encounter scenarios model uncertain events resulting in varying Avatar states depending on action plans chosen by players. Encounters are increasingly influenced by distant cultural meanings to challenge anticipation of the course of events (i.e. depending on the scenario, agreeable responding can result in a pleasant interaction or involvement in a scam). Players receive global feedback on the extent to which chosen actions correspond with a reference model for values (see appendix). Self-reflective elements are interspersed with short casual action and puzzle games, images, and information associated with the location of the Avatar. These features are included to vary game play, and can be skipped.

*Table 1: Features, dose, and tasks*

| Features                                       | Dose (in game frequency) | Tasks                                                                                                                                                                                                                                                                                                   |
|------------------------------------------------|--------------------------|---------------------------------------------------------------------------------------------------------------------------------------------------------------------------------------------------------------------------------------------------------------------------------------------------------|
| Introduction                                   | 1                        | <ul style="list-style-type: none"> <li>- Choose Avatar gender and name</li> <li>- Receive instruction: to identify with the personal Avatar</li> <li>- Introduction to Avatar storyline</li> <li>- Receive task instructions from LAKA (non-playing character with a mentoring role)</li> </ul>         |
| Encounters<br>(See screenshot in the appendix) | 16                       | <ul style="list-style-type: none"> <li>- Select action plans for the Avatar in encounters with non-playing characters (each instance offers 5 optional action plans, which are modelled after a reference set of values: generosity, moral discipline, patience, enthusiastic perseverance).</li> </ul> |
| Mood scenarios                                 | 8                        | <ul style="list-style-type: none"> <li>- Select action plans for the Avatar when subjected to an adverse event.</li> <li>- Given the adverse scenario: think of what your own affective state would be in this situation, and bear in mind the depicted emotional state of the Avatar.</li> </ul>       |
| Reflections                                    | 4                        | <ul style="list-style-type: none"> <li>- Assess satisfaction about selected Avatar actions on a scale of 0-10.</li> </ul>                                                                                                                                                                               |

|                     |    |                                                                                                                                                                                                                                                                                                                                                 |
|---------------------|----|-------------------------------------------------------------------------------------------------------------------------------------------------------------------------------------------------------------------------------------------------------------------------------------------------------------------------------------------------|
|                     |    | <ul style="list-style-type: none"> <li>- Receive feedback from LAKA on chosen action plans.</li> <li>- Receive feedback about the correspondence between satisfaction rating and LAKA assessment.</li> </ul>                                                                                                                                    |
| Attention training: | 3  | <ul style="list-style-type: none"> <li>- Guided (focused attention and open monitoring) meditation exercises for mental stability.</li> </ul>                                                                                                                                                                                                   |
| Tours:              | 16 | <ul style="list-style-type: none"> <li>- Skip or listen to 'tour-guide' voiceovers informing about pictures of the location visited by the Avatar.</li> </ul>                                                                                                                                                                                   |
| Loading screens     | -  | <ul style="list-style-type: none"> <li>- See where travel destinations are located on a geographical map.</li> </ul>                                                                                                                                                                                                                            |
| Mini-games:         | 8  | <ul style="list-style-type: none"> <li>- Action games: Steering a vehicle (by using tilt mechanism of tablet pc, or keyboard arrow controls) to arrive at the next encounter (reference: 'rocket bird').</li> <li>- Puzzle: Fix a road by connecting parts of the road to arrive at the next encounter (reference: 'plumber games').</li> </ul> |
| Festive closing     | 1  | <ul style="list-style-type: none"> <li>- Replay of 'extreme' responses throughout the game.</li> </ul>                                                                                                                                                                                                                                          |

### *Mode of delivery*

In accordance with patient suggestions for optimal reach, the rehabilitation clinic delivers professional assistance and the occasion for playing the serious game LAKA on site, besides downloading and playing on a home computer<sup>4</sup>. Suitable rooms with Wi-Fi connection, tablet computers with LAKA installed, and headphones are provided. Four 1-hour sessions of serious gaming are planned for 1 to 6 patients simultaneously during weeks 9-12 of their rehabilitation programme. The sessions are scheduled in connection with other therapy sessions to ease coordination with daily activities. In the first session, patients are briefly introduced to the serious game LAKA and instructed to complete the game independently during the second and third sessions. In the fourth session, patients participate in a debriefing. Experienced therapists (1 physiotherapist, and 3 psychologists) provide the introduction and debriefing sessions.

### *Programme theory*

The framework of context, mechanism, outcome (CMO) configurations is used to structure ongoing development of a programme theory for serious gaming as a complement during multidisciplinary rehabilitation.<sup>52</sup> To illustrate, a patient with an active coping style self-exposed for a short amount of time to unsupported serious gaming during multidisciplinary rehabilitation (context), experienced enjoyment and discrepancy regarding valued self-identities (mechanism), and expected this to contribute to health improvement (outcome)<sup>4</sup>. Timely building blocks for CMO configurations for serious gaming are deduced from the literature. Outcomes are interpreted using models of self and well-being (appendix), and relevant outcome domains for patients with CP or FSS.<sup>35 53 54</sup> Two comprehensive implementation models are used for the classification of context factors.<sup>55 56</sup> Finally, mechanisms of serious gaming are discerned as gaming behaviours (frequency, length, and performance of game play), and user experiences of gaming, simulation, and information systems. More specifically, subjective mechanisms may involve sense of presence,<sup>57</sup> technology acceptance,<sup>58</sup> positive and negative affect,<sup>59</sup> game-based learning,<sup>60</sup> and perceived 'learning transfer' to daily life.<sup>42</sup>

### **Measures**

#### Quantitative data

Patient web-survey self-assessments for routine outcome monitoring will be used, which are taken at the indication of eligibility (at baseline), after 8 weeks of treatment (intermediate), and again after 16

weeks of treatment (post). Surveying procedures include the facilitation of patients without convenient computer access and promotion of follow-up completion.<sup>4 61</sup> Primary outcome measures are selected from those available in patient records based on whether instruments are deemed valid and relevant (see table 2).<sup>35</sup> These endpoints include a numerical rating scale for current pain intensity,<sup>62</sup> the pain coping and cognitions list (PCCL),<sup>63</sup> fatigue as assessed by the Checklist Individual Strength (CIS),<sup>54</sup> and psychopathological symptoms as measured by the Symptom Checklist (SCL-90).<sup>46</sup> Secondary measures focus on other relevant outcomes such as patients' global impression of improvement after treatment.<sup>35</sup> Another widely used single item Likert-scale rating is used for measuring general health (poor to excellent).<sup>64</sup> Finally, numerical rating scale items are available to assess patients' satisfaction about treatment and functioning (see table 2).

Table 2: Quantitative outcome measures

| Variables                       | Measures                                                                                                     | Time of measurement                    |
|---------------------------------|--------------------------------------------------------------------------------------------------------------|----------------------------------------|
| <b>Primary outcomes</b>         |                                                                                                              |                                        |
| Current pain intensity          | 1 item Numerical Rating Scale (NRS) 0-10                                                                     | Baseline, intermediate, post treatment |
| Pain coping and cognition       | Pain Coping and Cognitions List (PCCL)                                                                       | "                                      |
| Fatigue                         | Checklist Individual Strength (CIS)                                                                          | "                                      |
| Psychopathological symptoms     | Symptom Check List (SCL-90)                                                                                  | "                                      |
| <b>Secondary outcomes</b>       |                                                                                                              |                                        |
| Clinically relevant improvement | Patient Global Impression of Change (PGIC)                                                                   | Intermediate, post treatment           |
| General subjective health       | "What do you think of your current health in general?"                                                       | "                                      |
| Perceived functioning           | "Please indicate how satisfied you are generally taken with your current level of functioning"               | "                                      |
| Treatment satisfaction          | Three Likert scale items, i.e. "Would you recommend this treatment centre to other rehabilitation patients?" | Post treatment                         |

Case-mix variables will be retrieved from patient records. Patient variables are based on screening records and involve demographic, health status, and treatment history information (see table 3).

Table 3: Patient characteristics

| Variables                    | Measures                                                                                                                                                     |
|------------------------------|--------------------------------------------------------------------------------------------------------------------------------------------------------------|
| Age                          | Years of age                                                                                                                                                 |
| Gender                       | % Female                                                                                                                                                     |
| Socio-economic status        | Highest education level, source of income                                                                                                                    |
| Coping style                 | Utrecht Coping List (UCL) <sup>65</sup>                                                                                                                      |
| Environment                  | Presence of problems with regard to social life, financial situation, trauma, work situation.                                                                |
| Symptoms                     | Duration (months), course, and location of somatic (pain) complaints                                                                                         |
| Physical status              | Body Mass Index, blood pressure, musculoskeletal conditions                                                                                                  |
| Other treatment              | Presence of and changes in medication usage. Frequency of health care visits. Previous visits to medical specialists, physiotherapists, and/or psychologist. |
| Treatment (modules) received | Automatic logs (session presence)                                                                                                                            |

Intervention mechanisms may cover subjective experiences and objective behaviours of serious gaming (see table 4). Automatic registrations in patient files enable objective assessment of serious gaming frequency, duration, progress, and performance. Moreover, a short survey was composed in

collaboration with the rehabilitation centre to measure subjective experiences shortly after serious gaming. This survey contains items on perceptions of using a serious game (regarding usefulness, ease of use, trust, enjoyment, goal clarity, challenge, and learning<sup>4 58 60</sup>), the 10-item short form of the positive and negative affect scale,<sup>66</sup> the involvement and realism scales from the Igroup Presence Questionnaire,<sup>57</sup> and (0-10) numerical rating scale item on perceived learning transfer. A reminder was sent to intervention group participants if the survey was not completed within a week after their last gaming session. Finally, a questionnaire on patient values may be used to explore relationships between mechanisms and outcomes of serious gaming.

*Table 4: Quantitative indicators for mechanisms*

| Variables                                    | Measures                                                                                                                                                      | Respondents                     | Time of measurement                    |
|----------------------------------------------|---------------------------------------------------------------------------------------------------------------------------------------------------------------|---------------------------------|----------------------------------------|
| Reach, dose, gaming performance              | Data logs: frequency, timing, length, progress, and scores of play                                                                                            | Intervention group              | During SG (automatic)                  |
| Acceptability and playability                | Selection of UTAUT 2 items (perceived usefulness, ease of use, trust, enjoyment)<br>Selection of EGameFlow items (clear goals, challenge, perceived learning) | Intervention group              | Post Serious Gaming                    |
| Positive and negative affect                 | PANAS-SF                                                                                                                                                      | Intervention group              | Post Serious Gaming                    |
| Presence (general, involvement, and realism) | Igroup Sense of Presence Questionnaire item for general sense of presence, and subscales for involvement and realism.                                         | Intervention group              | Post Serious Gaming                    |
| Learning transfer                            | Numerical rating scale (0-10): "Use the following slider to indicate to what extent you expect that the LAKA sessions contribute to your own treatment"       | Intervention group              | Post Serious Gaming                    |
| Values (expressed in thoughts and behaviour) | Values questionnaire*: 5-point Likert scales, i.e. "If I find it necessary, I'll intervene to help or to protect others".                                     | Intervention and control groups | Baseline, intermediate, post treatment |

\*Psychometric properties are still under investigation. Empirical support for good scale internal consistency, and strong associations with psychological well-being in rehabilitating patients were documented in a report for the Dutch Committee on Test Affairs (COTAN).

### Qualitative data

Protocols for focus group and semi-structured patient interviews are informed by the CMO building blocks and principles for interviewing in realist evaluation.<sup>67</sup> Accordingly, the role of the interviewer ranges from open and explorative towards more educational and evaluative when CMO configurations become better delineated. Providers are expected to be especially knowledgeable about context and mechanisms of serious gaming, while patients may say the most about context and outcomes. Purposive sampling of participants is used until reaching a point of data saturation. All interviews are tape-recorded and verbatim transcribed. Transcripts and a summary of findings are sent to participants by e-mail to enable them to check if their views are accurately reflected.

### *Provider (focus group) interviewing*

Four focus group interviews are held, two before and two after the naturalistic experiment, to involve stakeholders in the ongoing development of serious gaming and programme theory. Participant selection and topics are based on actual data needs. Heterogeneous groups of care providers, implementers, and experts (in ICT, well-being, and serious gaming) are invited for the first and last

1  
2  
3 discussion meetings. The first interview focused on the research goals for an open discussion. The last  
4 group interview will focus on programme theory for member checking and refinement. Homogenous  
5 groups of provider participants may be invited for the second and third focus groups for more in-depth  
6 information. Provider participants are asked to share positive and/or negative feedback about serious  
7 gaming via a secured web-form. This includes information on the occurrence and management of  
8 adverse events and/or unintended effects during serious gaming.  
9  
10

### 11 *Patient interviewing*

12  
13 Two open interview questions about gaming experience and perceived learning transfer are added to  
14 the post-gaming survey for intervention group participants. Patient participants with high and low  
15 scores on a 1-item numerical rating scale (0-10) for perceived learning transfer are invited for a semi-  
16 structured interview after their rehabilitation treatment. These interviewees are asked to describe their  
17 health outcomes during rehabilitation, and to list the three most important reasons why serious gaming  
18 did, or did not, contribute positively or negatively to this process. A point of saturation is reached if the  
19 three factors (context and/or mechanisms) mentioned are all richly described. Control group  
20 interviewees are matched to some of the intervention group interviewees to compare rehabilitation  
21 outcome changes for similar cases with versus without serious gaming.  
22  
23  
24  
25  
26

### 27 **Analysis**

#### 28 Statistical outcome evaluation

29  
30 Quantitative data will be imported in SPSS 22, described after statistical inferences, and analysed on  
31 intention-to-treat basis. All case-mix variables are described for individual study participants, as well as  
32 the differences between intervention group and control group participants. Multivariate mixed-linear  
33 modelling techniques will be used to evaluate the extent to which serious gaming predicts variance in  
34 patient outcome levels between the intermediate and final outcome assessments of the rehabilitation  
35 programme. Effective sample size and intra-class coefficients will be calculated to determine  
36 dependency on hierarchical patterns in outcome variation by care provider levels. An optimal prediction  
37 model will be specified, correcting for potential unbalances between the study groups (at baseline  
38 and/or intermediate), and/or important higher-level random effects.  
39  
40  
41  
42

#### 43 Process analyses

44 A programme theory will be created after a sequence of analysis steps. In each step, analyses will be  
45 performed completely by MV and in part by MJ or AZ (independent coding of interviews, and re-running  
46 syntax), and discussions will be held involving a third author (HV) to resolve differences and find  
47 agreement about the results. First, concurrently collected qualitative data analyses will be performed to  
48 identify plausible CMO configurations from the perspectives stakeholders. All qualitative data will be  
49 coded in vivo and higher order coded using CMO building blocks to determine configurations. Secondly,  
50 a selection of key CMO configurations will be made based on counts of the number of participants  
51 supporting them in their open text responses to the post-gaming survey. Hypotheses will contain  
52 specific expectations of (linear) relationships implied by the CMOs. If needed, additional provider or site  
53 level data (i.e. debriefing session group sizes) will be retrieved from clinical administration records.  
54 Third, quantitative data will be screened by testing internal consistency in SPSS or data triangulation  
55  
56  
57  
58  
59  
60

1  
2  
3 with qualitative data if possible. Fourth, hypotheses will be tested with available and valid quantitative  
4 data. Fifth, data from the last focus group will be coded. Sixth, quantitative and qualitative findings will  
5 be mixed for an overall interpretation and drawing final conclusions.  
6  
7

### 8 9 **Power calculation**

10 From practical, theoretical and statistical perspectives, a powerful primary outcome assessment was  
11 anticipated by focusing on recruiting a sufficient number of individual patients from the four  
12 participating treatment facilities. The rehabilitation centre (n=1), intervention sites (n=2), as well as the  
13 number of time-points (3), are practically fixed. Analysis of unpublished pilot data suggested that  
14 variation in baseline to post treatment outcome changes between treatment locations might be  
15 negligible relative to individual variation within sites (intra-class correlations > .05).  
16  
17

18 Using G\*Power, a required sample size of 212 participants was calculated for determining a  
19 small effect by means of a MANOVA test of global effects. A small to medium effect size was expected  
20 based on a meta-analysis about the effect of Serious Games for Health on cognition, motivation, and  
21 psychological outcomes<sup>3</sup>. Therefore, the following parameters were inserted: for power (1-Beta), 0.8;  
22 effect-size ( $f^2(V)$ ), .0625; type-II error probability (alpha) = .05; number of dependent variables, 5; and  
23 number of groups, 2. Anticipating some level dependence and/or randomly missing data (pain coping  
24 and cognition measures are not filled out by patients reporting 0 pain intensity at baseline), 250 patient  
25 participants will be recruited. Assuming 20% treatment and study attrition rates and an average weekly  
26 inflow of 9 patients starting with their treatment within each of the four facilities, outcome data are  
27 available 6 months after recruiting the first patient.  
28  
29  
30  
31

### 32 33 **ETHICS AND DISSEMINATION**

34 Ethical approval for the mixed-methods protocol was obtained from the psychological ethics committee  
35 of Tilburg School of Social and Behavioural Sciences (EC-2016.25t). In the absence of a legal obligation  
36 for medical ethics review, independent judgement was provided on the protection of patient rights by  
37 conformity to the letter and rationale of the applicable laws and research practice. Patient participants  
38 are consented before participation, that is before receiving the additional (5-10 minute) survey  
39 (intervention group), being invited for a semi-structured interview, or retrieving their codified data.  
40 Participants were protected against harm by regular clinical safety measures throughout. Professional  
41 participants are also consented before participation in qualitative data collections. Under supervision of  
42 MJ, MV is responsible for safe storage and the accessibility of (codified) research data to all authors.  
43 Qualitative and quantitative results will be presented and discussed together in one or more research  
44 article(s), and at one or more international scientific conferences. A summary of study results will be  
45 provided to the study participants.  
46  
47  
48  
49  
50

### 51 52 **DISCUSSION**

53 The novelty of the serious gaming intervention and study methods are strengths of the proposed  
54 evaluation, but imply limitations as well. LAKA is the first serious game that promotes practice for self-  
55 process enhancement under highly prevalent adverse conditions such as CP or FSS. CMO configurations  
56 may be identified that are transferable to other populations and settings where similar approaches to  
57 behavioural change are beneficial<sup>68</sup>. However, internal and external validity are threatened due to  
58  
59  
60



1  
2  
3 divergence from the golden standard procedures of a (cluster) randomized controlled (multi-centre)  
4 trial. Instead, pragmatic considerations for the deployment of serious gaming during rehabilitation in  
5 two sites of a single Dutch centre led treatment allocation and recruitment methods. Different  
6 comparisons with serious gaming (i.e. usual care, waiting list, or text based computer-based  
7 intervention), more elaborate psychiatric assessment, and/or long-term follow up measurement are  
8 precluded. The realist evaluation principles and mixed-methods used in this study are increasingly  
9 accepted in scientific communities as means to compensate for practical study limitations and to build  
10 programme theories that enhance future predictions of intervention effects across patients and health  
11 care settings.<sup>69 70</sup>

12  
13  
14  
15 Legitimate application of mixed-methods is promoted by the protocol in various ways. First,  
16 participant recruitment and selection methods for quantitative and qualitative examinations allow a  
17 strong representation of patients receiving bio-psychosocial treatment in a regular outpatient setting.  
18 This differs from studies in which the eligibility of applicants for computer-based intervention depends  
19 on motivation and/or ability to use a computer or internet facilities.<sup>71 72</sup> Secondly, perspectives of  
20 insiders (patients, health care providers and developers) and outsiders (independent experts and  
21 members of the research team) will be utilized. Third, relevant theoretical constructs are specified  
22 before quantitative and qualitative data collections to prevent process analysis results being strongly  
23 affected by the sequencing of qualitative and quantitative methods. Fourth, predefined steps structure  
24 data convergence and switches in epistemological paradigms when qualitative methods are used to  
25 propose quantitative results (in advance) and to explain them (afterwards).  
26  
27  
28  
29  
30

### 31 **ACKNOWLEDGEMENTS**

32 Acknowledged for their role in the development of serious gaming are: Ciran (owner & developer):  
33 Alfonsus van Bergen, Jan Jochijms, and Jeroen van Bergen; software developers: Paladin Studios, Marcel  
34 Lips; contributors of intellectual content: Karel Michiels, and Jac Geurts.  
35  
36

### 37 **AUTHORS' CONTRIBUTIONS**

38 MV, HV, AM, and MJ conceived the protocol. MV drafted the work, which was critically revisited by HV,  
39 AZ, AM and MJ for important intellectual content. All authors have given their final approval of the  
40 version to be published and agree to be accountable for all aspects of the work.  
41  
42  
43

### 44 **FUNDING STATEMENT**

45 The work was supported by Ciran in the development LAKA, allocation of serious gaming, and provision  
46 of raw quantitative data. Ciran is a foundation that develops and provides a rehabilitation care  
47 programme for complex chronic pain and fatigue symptoms in association with Radboud academic  
48 medical centre (The Netherlands). Qualitative data collection, data management, data analyses,  
49 interpretation of results, writing of the report, and publication decisions are authorized by university  
50 staff members.  
51  
52  
53  
54

### 55 **COMPETING INTERESTS STATEMENT**

56 All authors have completed the ICMJE uniform disclosure form and declare:  
57  
58  
59  
60

1  
2  
3 Dr. Vugts reports employment by Ciran, and is provided time and occasion to conduct independent  
4 doctoral research by way of agreement at Tranzo, Scientific Centre for Care and Welfare, Tilburg  
5 University. The terms of this arrangement have been reviewed and approved by Tranzo in accordance  
6 with its policy on objectivity in research.

7  
8 Dr. Joosen has nothing to disclose.

9  
10 Dr. Zedlitz has nothing to disclose.

11  
12 Dr. Vrijhoef reports personal fees from Ciran, outside the submitted work.

13  
14 Dr. Mert has nothing to disclose.

## 15 REFERENCES

- 16 1. Gentile DA, Anderson CA, Yukawa S, et al. The effects of prosocial video games on prosocial behaviors:  
17 International evidence from correlational, longitudinal, and experimental studies. *Personality*  
18 *and Social Psychology Bulletin* 2009.
- 19 2. Primack BA, Carroll MV, McNamara M, et al. Role of video games in improving health-related  
20 outcomes: a systematic review. *American journal of preventive medicine* 2012;**42**(6):630-38.
- 21 3. DeSmet A, Van Ryckeghem D, Compernelle S, et al. A meta-analysis of serious digital games for  
22 healthy lifestyle promotion. *Preventive medicine* 2014;**69**:95-107.
- 23 4. Vugts MA, Joosen MC, van Bergen AH, et al. Feasibility of Applied Gaming During Interdisciplinary  
24 Rehabilitation for Patients With Complex Chronic Pain and Fatigue Complaints: A Mixed-  
25 Methods Study. *JMIR serious games* 2016;**4**(1).
- 26 5. Breivik H, Collett B, Ventafridda V, et al. Survey of chronic pain in Europe: prevalence, impact on daily  
27 life, and treatment. *European journal of pain* 2006;**10**(4):287-87.
- 28 6. Kennedy J, Roll JM, Schraudner T, et al. Prevalence of persistent pain in the US adult population: new  
29 data from the 2010 national health interview survey. *The Journal of Pain* 2014;**15**(10):979-84.
- 30 7. Fayaz A, Croft P, Langford R, et al. Prevalence of chronic pain in the UK: a systematic review and meta-  
31 analysis of population studies. *Bmj Open* 2016;**6**(6):e010364.
- 32 8. Nakamura M, Nishiwaki Y, Ushida T, et al. Prevalence and characteristics of chronic musculoskeletal  
33 pain in Japan: a second survey of people with or without chronic pain. *Journal of Orthopaedic*  
34 *Science* 2014;**19**(2):339-50.
- 35 9. Häuser W, Wolfe F, Henningsen P, et al. Untying chronic pain: prevalence and societal burden of  
36 chronic pain stages in the general population—a cross-sectional survey. *BMC Public Health*  
37 2014;**14**(1):1.
- 38 10. Gatchel RJ, Peng YB, Peters ML, et al. The biopsychosocial approach to chronic pain: scientific  
39 advances and future directions. *Psychological bulletin* 2007;**133**(4):581.
- 40 11. Wessely SHS. How should functional somatic syndromes be diagnosed? *Int J Behav Med*  
41 2013;**20**:239-41.
- 42 12. Meeus M, Nijs J. Central sensitization: a biopsychosocial explanation for chronic widespread pain in  
43 patients with fibromyalgia and chronic fatigue syndrome. *Clinical rheumatology* 2007;**26**(4):465-  
44 73.
- 45 13. Woolf CJ. Central sensitization: implications for the diagnosis and treatment of pain. *Pain*  
46 2011;**152**(3):S2-S15.
- 47 14. Burri A, Ogata S, Vehof J, et al. Chronic widespread pain: clinical comorbidities and psychological  
48 correlates. *Pain* 2015;**156**(8):1458-64.
- 49 15. Burri A, Ogata S, Livshits G, et al. The Association between Chronic Widespread Musculoskeletal  
50 Pain, Depression and Fatigue Is Genetically Mediated. *Plos One* 2015;**10**(11):e0140289.
- 51  
52  
53  
54  
55  
56  
57  
58  
59  
60



16. MacDonald G, Leary MR. Why does social exclusion hurt? The relationship between social and physical pain. *Psychological bulletin* 2005;**131**(2):202.
17. Henningsen P, Zipfel S, Herzog W. Management of functional somatic syndromes. *The Lancet* 2007;**369**(9565):946-55.
18. Afari N, Ahumada SM, Wright LJ, et al. Psychological trauma and functional somatic syndromes: a systematic review and meta-analysis. *Psychosomatic medicine* 2014;**76**(1):2.
19. Vlaeyen JW, Linton SJ. Fear-avoidance and its consequences in chronic musculoskeletal pain: a state of the art. *Pain* 2000;**85**(3):317-32.
20. Vercoulen J, Swanink C, Galama J, et al. The persistence of fatigue in chronic fatigue syndrome and multiple sclerosis: development of a model. *Journal of psychosomatic research* 1998;**45**(6):507-17.
21. McCracken LM, Morley S. The psychological flexibility model: A basis for integration and progress in psychological approaches to chronic pain management. *The Journal of Pain* 2014;**15**(3):221-34.
22. Kamper SJ, Apeldoorn AT, Chiarotto A, et al. Multidisciplinary biopsychosocial rehabilitation for chronic low back pain. *The Cochrane Library* 2014.
23. Andersson G. Internet-delivered psychological treatments. *Annual review of clinical psychology* 2016;**12**:157-79.
24. Wentzel J, van der Vaart R, Bohlmeijer ET, et al. Mixing online and face-to-face therapy: How to benefit from blended care in mental health care. *JMIR mental health* 2016;**3**(1).
25. Peng W, Lin J-H, Crouse J. Is playing exergames really exercising? A meta-analysis of energy expenditure in active video games. *Cyberpsychology, Behavior, and Social Networking* 2011;**14**(11):681-88.
26. Lumsden J, Edwards EA, Lawrence NS, et al. Gamification of cognitive assessment and cognitive training: a systematic review of applications and efficacy. *JMIR Serious Games* 2016;**4**(2):e11.
27. Turner WA, Casey LM. Outcomes associated with virtual reality in psychological interventions: where are we now? *Clinical psychology review* 2014;**34**(8):634-44.
28. Malloy KM, Milling LS. The effectiveness of virtual reality distraction for pain reduction: a systematic review. *Clinical psychology review* 2010;**30**(8):1011-18.
29. Laver K, George S, Thomas S, et al. Virtual reality for stroke rehabilitation: an abridged version of a Cochrane review. *European journal of physical and rehabilitation medicine* 2015;**51**(4):497-506.
30. DasMahapatra P, Chiauuzi E, Pujol LM, et al. Mediators and moderators of chronic pain outcomes in an online self-management program. *The Clinical journal of pain* 2015;**31**(5):404-13.
31. Trompetter HR, Bohlmeijer ET, Fox J-P, et al. Psychological flexibility and catastrophizing as associated change mechanisms during online Acceptance & Commitment Therapy for chronic pain. *Behaviour Research and Therapy* 2015;**74**:50-59.
32. Baranowski T, Buday R, Thompson DI, et al. Playing for real: video games and stories for health-related behavior change. *American journal of preventive medicine* 2008;**34**(1):74-82. e10.
33. Ryan RM, Rigby CS, Przybylski A. The motivational pull of video games: A self-determination theory approach. *Motivation and emotion* 2006;**30**(4):344-60.
34. Connolly TM, Boyle EA, MacArthur E, et al. A systematic literature review of empirical evidence on computer games and serious games. *Computers & Education* 2012;**59**(2):661-86.
35. Dworkin RH, Turk DC, Wyrwich KW, et al. Interpreting the clinical importance of treatment outcomes in chronic pain clinical trials: IMMPACT recommendations. *The Journal of Pain* 2008;**9**(2):105-21.
36. Craig P, Dieppe P, Macintyre S, et al. Developing and evaluating complex interventions: the new Medical Research Council guidance. *BMJ (Clinical research ed)* 2008;**337**:a1655.
37. Chaudoir SR, Dugan AG, Barr CH. Measuring factors affecting implementation of health innovations: a systematic review of structural, organizational, provider, patient, and innovation level measures. *Implementation Science* 2013;**8**(1):1.

- 1
  - 2
  - 3
  - 4
  - 5
  - 6
  - 7
  - 8
  - 9
  - 10
  - 11
  - 12
  - 13
  - 14
  - 15
  - 16
  - 17
  - 18
  - 19
  - 20
  - 21
  - 22
  - 23
  - 24
  - 25
  - 26
  - 27
  - 28
  - 29
  - 30
  - 31
  - 32
  - 33
  - 34
  - 35
  - 36
  - 37
  - 38
  - 39
  - 40
  - 41
  - 42
  - 43
  - 44
  - 45
  - 46
  - 47
  - 48
  - 49
  - 50
  - 51
  - 52
  - 53
  - 54
  - 55
  - 56
  - 57
  - 58
  - 59
  - 60
38. Webb T, Joseph J, Yardley L, et al. Using the internet to promote health behavior change: a systematic review and meta-analysis of the impact of theoretical basis, use of behavior change techniques, and mode of delivery on efficacy. *Journal of medical Internet research* 2010;**12**(1):e4.
39. Elbert NJ, van Os-Medendorp H, van Renselaar W, et al. Effectiveness and cost-effectiveness of ehealth interventions in somatic diseases: a systematic review of systematic reviews and meta-analyses. *Journal of medical Internet research* 2014;**16**(4):e110.
40. Berwick DM. The science of improvement. *Jama* 2008;**299**(10):1182-84.
41. Weise C, Kleinstaub M, Andersson G. Internet-Delivered Cognitive-Behavior Therapy for Tinnitus: A Randomized Controlled Trial. *Psychosomatic Medicine* 2016;**78**(4):501-10.
42. Crookall D. Serious games, debriefing, and simulation/gaming as a discipline. *Simulation & gaming* 2010;**41**(6):898-920.
43. Kharrazi H, Lu AS, Gharghabi F, et al. A scoping review of health game research: Past, present, and future. *Games for health: Research, Development, and Clinical Applications* 2012;**1**(2):153-64.
44. Creswell JW, Clark VLP. *Designing and conducting mixed methods research*. 2007.
45. Garschagen A, Steegers MAH, van Bergen AHMM, et al. Is there a need for including spiritual care in interdisciplinary rehabilitation of chronic pain patients? Investigating an innovative strategy. *Pain Practice* 2015;**15**(7):671-87.
46. Arrindell WA, Ettema J. *SCL-90: Handleiding bij een multidimensionele psychopathologie-indicator*: Swets test publishers, 1986.
47. Swinkels-Meewisse E, Swinkels R, Verbeek A, et al. Psychometric properties of the Tampa Scale for kinesiophobia and the fear-avoidance beliefs questionnaire in acute low back pain. *Manual therapy* 2003;**8**(1):29-36.
48. Vago DR, David SA. Self-awareness, self-regulation, and self-transcendence (S-ART): a framework for understanding the neurobiological mechanisms of mindfulness. *Frontiers in human neuroscience* 2012;**6**:296.
49. Morley S. The self in pain. *Reviews in pain* 2010;**4**(1):24-27.
50. Graafland M, Dankbaar M, Mert A, et al. How to systematically assess serious games applied to health care. *JMIR serious games* 2014;**2**(2):e11.
51. Lutz A, Slagter HA, Dunne JD, et al. Attention regulation and monitoring in meditation. *Trends in cognitive sciences* 2008;**12**(4):163-69.
52. Pawson R, Tilley N. *Realistic evaluation*: Sage, 1997.
53. Zijlema WL, Stolk RP, Löwe B, et al. How to assess common somatic symptoms in large-scale studies: a systematic review of questionnaires. *Journal of psychosomatic research* 2013;**74**(6):459-68.
54. Dittner AJ, Wessely SC, Brown RG. The assessment of fatigue: a practical guide for clinicians and researchers. *Journal of psychosomatic research* 2004;**56**(2):157-70.
55. Damschroder LJ, Aron DC, Keith RE, et al. Fostering implementation of health services research findings into practice: a consolidated framework for advancing implementation science. *Implementation science* 2009;**4**(1):1.
56. Grol R, Wensing M. What drives change? Barriers to and incentives for achieving evidence-based practice. *Medical Journal of Australia* 2004;**180**(6):S57.
57. Lessiter J, Freeman J, Keogh E, et al. A cross-media presence questionnaire: The ITC-Sense of Presence Inventory. *Presence: Teleoperators and virtual environments* 2001;**10**(3):282-97.
58. Venkatesh V, Thong JY, Xu X. Consumer acceptance and use of information technology: extending the unified theory of acceptance and use of technology. *MIS quarterly* 2012;**36**(1):157-78.
59. Watson D, Clark LA, Tellegen A. Development and validation of brief measures of positive and negative affect: the PANAS scales. *Journal of personality and social psychology* 1988;**54**(6):1063.

- 1  
2  
3  
4  
5  
6  
7  
8  
9  
10  
11  
12  
13  
14  
15  
16  
17  
18  
19  
20  
21  
22  
23  
24  
25  
26  
27  
28  
29  
30  
31  
32  
33  
34  
35  
36  
37  
38  
39  
40  
41  
42  
43  
44  
45  
46  
47  
48  
49  
50  
51  
52  
53  
54  
55  
56  
57  
58  
59  
60
60. Fu F-L, Su R-C, Yu S-C. EGameFlow: A scale to measure learners' enjoyment of e-learning games. *Computers & Education* 2009;**52**(1):101-12.
  61. Eysenbach G. Improving the quality of Web surveys: the Checklist for Reporting Results of Internet E-Surveys (CHERRIES). *Journal of medical Internet research* 2004;**6**(3):e34.
  62. Price DD, Bush FM, Long S, et al. A comparison of pain measurement characteristics of mechanical visual analogue and simple numerical rating scales. *Pain* 1994;**56**(2):217-26.
  63. Spinhoven P, Kuile M, Kole-Snijders AM, et al. Catastrophizing and internal pain control as mediators of outcome in the multidisciplinary treatment of chronic low back pain. *European Journal of Pain* 2004;**8**(3):211-19.
  64. Ware Jr JE, Sherbourne CD. The MOS 36-item short-form health survey (SF-36): I. Conceptual framework and item selection. *Medical care* 1992:473-83.
  65. Schreurs PJG, Van de Willige G, Brosschot JF, et al. *De Utrechtse Coping lijst: Omgaan met problemen en gebeurtenissen*: Pearson, 1993.
  66. Thompson ER. Development and validation of an internationally reliable short-form of the positive and negative affect schedule (PANAS). *Journal of cross-cultural psychology* 2007;**38**(2):227-42.
  67. Manzano A. The craft of interviewing in realist evaluation. *Evaluation* 2016:1356389016638615.
  68. Spijkerman M, Pots W, Bohlmeijer E. Effectiveness of online mindfulness-based interventions in improving mental health: A review and meta-analysis of randomised controlled trials. *Clinical psychology review* 2016;**45**:102-14.
  69. Hawkins AJ. Realist evaluation and randomised controlled trials for testing program theory in complex social systems. *Evaluation* 2016;**22**(3):270-85.
  70. Marchal B, van Belle S, van Olmen J, et al. Is realist evaluation keeping its promise? A review of published empirical studies in the field of health systems research. *Evaluation* 2012;**18**(2):192-212.
  71. Chiauzzi E, Pujol LA, Wood M, et al. painACTION-Back Pain: A self-management website for people with chronic back pain. *Pain Medicine* 2010;**11**(7):1044-58.
  72. Trompetter HR, Bohlmeijer ET, Veehof MM, et al. Internet-based guided self-help intervention for chronic pain based on Acceptance and Commitment Therapy: A randomized controlled trial. *Journal of Behavioral Medicine* 2015;**38**(1):66-80.

## SUPPLEMENTARY FILE

## Content:

1. Developer assumptions
2. Screenshot example
3. Information about the design rationale, functionality, validity proof (before outcome evaluation), and data protection

1. *Developer assumptions*

| Developer assumptions                                                                                                                                                                                                                                                                                                                                                                                                                                                                                                                                                                                                                                                                                                                                                                                                                                                                                                                                                         | Related theory                                                                                                                                                                                                                                                                                                                                                                                                                                                                                                                                                                                                                                                                                                                                                                                           |
|-------------------------------------------------------------------------------------------------------------------------------------------------------------------------------------------------------------------------------------------------------------------------------------------------------------------------------------------------------------------------------------------------------------------------------------------------------------------------------------------------------------------------------------------------------------------------------------------------------------------------------------------------------------------------------------------------------------------------------------------------------------------------------------------------------------------------------------------------------------------------------------------------------------------------------------------------------------------------------|----------------------------------------------------------------------------------------------------------------------------------------------------------------------------------------------------------------------------------------------------------------------------------------------------------------------------------------------------------------------------------------------------------------------------------------------------------------------------------------------------------------------------------------------------------------------------------------------------------------------------------------------------------------------------------------------------------------------------------------------------------------------------------------------------------|
| <p>The rehabilitation program is based on a (four dimensional) bio-psycho-social-spiritual treatment model in which Eastern and Western (medical) interventions are integrated. Interventions are aimed at improving 'mobility of mind', which is defined as: flexibility in accommodating 2 dynamic processes: 1) participation in private, social, and work roles, and 2) the ability to participate. Ability to participate depends on four aspects: symptoms (signals due to organ system injury or disturbance in shaping and controlling one's life or 'existence'), autonomy, perspective ('to see one's opportunities for finding meaning in life through inspiration'), and values. A reference for values is given by generosity, moral discipline, patience, enthusiastic perseverance, and mental stability. LAKA was designed to offer covert learning and skills training for enhancing a sense of self characterized by autonomy, values, and perspective.</p> | <p>This learning content may converge with and diverge from related concepts known in published scientific literature, including:</p> <ul style="list-style-type: none"> <li>- Categories of the International Classification of Functioning: specific (higher) mental functions, and activities and participation domains 6-9.<sup>1</sup></li> <li>- Coping flexibility under conditions of CP or FSS.<sup>2</sup></li> <li>- Eudaemonist process of psychological well-being.<sup>3</sup></li> <li>- Autonomously motivated pro-social behaviour.<sup>4,5</sup></li> <li>- (Neuro)psychological processes associated with similar practices (focused attention, open monitoring, and ethical enhancement) in general: self-awareness, self-regulation, and self-transcendence.<sup>6</sup></li> </ul> |
| <p>Improvement in mobility of mind is associated with better health outcomes after rehabilitation in patients with complex pain or fatigue (1<sup>st</sup> and 2<sup>nd</sup>).</p>                                                                                                                                                                                                                                                                                                                                                                                                                                                                                                                                                                                                                                                                                                                                                                                           | <p>Learning content may converge with and diverge from similar plausible targets in non-pharmacological treatment for patients with CP or FSS: Internal control beliefs (+), avoidance (-), self-acceptance (+), mindfulness (+), values-based action (+), rumination (-), catastrophizing (-), negative (-) and positive (+) mood<sup>2,7</sup></p>                                                                                                                                                                                                                                                                                                                                                                                                                                                     |
| <p>(Video) game mechanics can be leveraged to enhance learning by through player's self-awareness and intrinsic motivation. The game is of a relatively short duration, but aims to promote continued practice by any means outside the game.</p>                                                                                                                                                                                                                                                                                                                                                                                                                                                                                                                                                                                                                                                                                                                             | <p>Plausible ways in which video game mechanics may affect the self in players.</p> <ul style="list-style-type: none"> <li>- Self-efficacy theory: vicarious learning in health behaviour games.<sup>8</sup></li> <li>- Self-determination theory: gaming elicits representations of valued self-identities in players (through autonomy, competence, and relatedness).<sup>9</sup></li> <li>- Meta-cognitive processing is a likely consequence of, and characterizes interaction in the context of video game-play.<sup>10</sup></li> </ul>                                                                                                                                                                                                                                                            |

2. Screenshot (London Hyde Park)

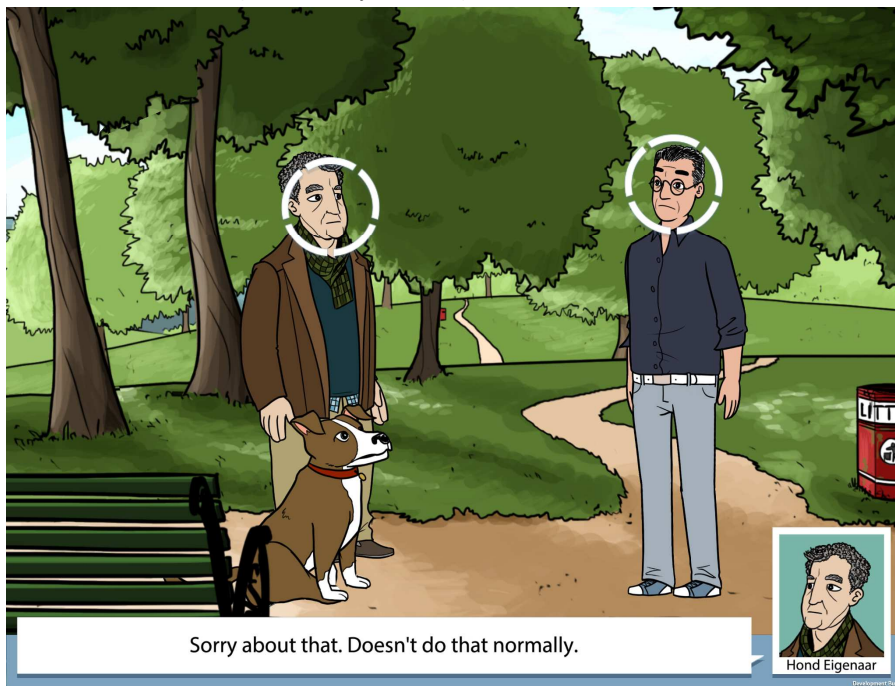

1  
2  
3  
4  
5  
6  
7  
8  
9  
10  
11  
12  
13  
14  
15  
16  
17  
18  
19  
20  
21  
22  
23  
24  
25  
26  
27  
28  
29  
30  
31  
32  
33  
34  
35  
36  
37  
38  
39  
40  
41  
42  
43  
44  
45  
46  
47  
48  
49  
50  
51  
52  
53  
54  
55  
56  
57  
58  
59  
60

## 3. Information about the design rationale, functionality, validity proof (before outcome evaluation), and data protection

| Category                        | Item                           | Question                                                                                     | Answer                                                                                                                                                                                                                                                                                                       |
|---------------------------------|--------------------------------|----------------------------------------------------------------------------------------------|--------------------------------------------------------------------------------------------------------------------------------------------------------------------------------------------------------------------------------------------------------------------------------------------------------------|
| <u>Game description</u>         |                                |                                                                                              |                                                                                                                                                                                                                                                                                                              |
| Meta-data                       | Operating system               | Operating systems of the game                                                                | Android, iOS, Windows, OS X                                                                                                                                                                                                                                                                                  |
|                                 | Version                        | Version                                                                                      | Beta+                                                                                                                                                                                                                                                                                                        |
|                                 | Web-link                       | Web-link                                                                                     | Yes* <sup>1</sup>                                                                                                                                                                                                                                                                                            |
|                                 | Project type                   | Commercial, non-commercial, other                                                            | Non-commercial                                                                                                                                                                                                                                                                                               |
|                                 | Access                         | Public / restricted / other                                                                  | Restricted                                                                                                                                                                                                                                                                                                   |
|                                 | Adjunct devices                | Is an adjunct device needed?                                                                 | No adjunct device needed                                                                                                                                                                                                                                                                                     |
|                                 | Development                    | Funding                                                                                      | How was development funded? Eg, funding agencies, investors                                                                                                                                                                                                                                                  |
| Sponsoring / Advertising        | Advertisement policy           | Is the game free of commercial pop-ups?                                                      | Yes                                                                                                                                                                                                                                                                                                          |
|                                 |                                | If not, what is advertised?                                                                  | NA                                                                                                                                                                                                                                                                                                           |
|                                 | Sources of income              | Are there sources of income within the game?                                                 | No                                                                                                                                                                                                                                                                                                           |
|                                 | Sources of income outside game | What are the sources of income of the owner/distributor?                                     | The owner and distributor (Ciran) is a foundation providing outpatient rehabilitation care covered by health insurance.                                                                                                                                                                                      |
| Potential conflicts of interest | Affiliations                   | What affiliations do the publishers have that could influence content or user group?         | Publishers are affiliated with the owner/distributor                                                                                                                                                                                                                                                         |
|                                 | Conflicts of interest          | What interests do the publishers have that could influence the game's content or user group? | Content and user groups are based on the objective of Ciran to improve outpatient rehabilitation for patients with complex chronic pain and/or fatigue. The primary (tentative) purpose of game design is the improvement of (independent) engagement with learning content during a rehabilitation program. |
|                                 | Disclosure                     | Are conflicts of interest disclosed?                                                         | Yes                                                                                                                                                                                                                                                                                                          |
| <u>Rationale</u>                |                                |                                                                                              |                                                                                                                                                                                                                                                                                                              |
| Purpose                         | Goal or purpose                | What is (are) the purpose(s) of the game?                                                    | To facilitate learning and promote practice for 'mobility of mind' (see developer assumptions) to support recovery in patients with complex chronic pain and/or fatigue.                                                                                                                                     |
|                                 | Disclosure                     | Is (are) the purpose(s) disclosed to users?                                                  | Yes                                                                                                                                                                                                                                                                                                          |
| Medical device                  | Medical device                 | Is the serious game a medical device, or not?                                                | Not                                                                                                                                                                                                                                                                                                          |
|                                 | Class                          | If yes, which class?                                                                         | NA                                                                                                                                                                                                                                                                                                           |
|                                 | Approval by legal bodies       | If yes, does it comply with the necessary requirements (FDA-approval, CE-mark?).             | NA                                                                                                                                                                                                                                                                                                           |
| User group                      | Specific user groups           | For each user group: disease/condition                                                       | Patients with chronic pain and fatigue, and problems in multiple (other) domains of functioning.                                                                                                                                                                                                             |



|                      | Description                     | Please specify gender, age (range), and other relevant descriptive items.      | See inclusion and exclusion criteria as listed in the main body of the article.                                                                                                                                                                                                                                                                                                                                                                                                                                                                                                                                                                                                                                                                                                                                                                                                                                                                                                                                                                                                                                                                                                                                                                                                                                                                                                                                                                                                                                                                                                                                                                                                                              |
|----------------------|---------------------------------|--------------------------------------------------------------------------------|--------------------------------------------------------------------------------------------------------------------------------------------------------------------------------------------------------------------------------------------------------------------------------------------------------------------------------------------------------------------------------------------------------------------------------------------------------------------------------------------------------------------------------------------------------------------------------------------------------------------------------------------------------------------------------------------------------------------------------------------------------------------------------------------------------------------------------------------------------------------------------------------------------------------------------------------------------------------------------------------------------------------------------------------------------------------------------------------------------------------------------------------------------------------------------------------------------------------------------------------------------------------------------------------------------------------------------------------------------------------------------------------------------------------------------------------------------------------------------------------------------------------------------------------------------------------------------------------------------------------------------------------------------------------------------------------------------------|
|                      | Limits                          | Are there age limits, or other limits?                                         | According to PEGI classification, the content of the game was found suitable for people who are at least 12 years of age, because it contains some events of mild swearing.                                                                                                                                                                                                                                                                                                                                                                                                                                                                                                                                                                                                                                                                                                                                                                                                                                                                                                                                                                                                                                                                                                                                                                                                                                                                                                                                                                                                                                                                                                                                  |
|                      | Disclosure                      | Is the intended user group disclosed?                                          | Yes                                                                                                                                                                                                                                                                                                                                                                                                                                                                                                                                                                                                                                                                                                                                                                                                                                                                                                                                                                                                                                                                                                                                                                                                                                                                                                                                                                                                                                                                                                                                                                                                                                                                                                          |
| Setting              | Patient care                    | Is the game used in patient care?                                              | Yes                                                                                                                                                                                                                                                                                                                                                                                                                                                                                                                                                                                                                                                                                                                                                                                                                                                                                                                                                                                                                                                                                                                                                                                                                                                                                                                                                                                                                                                                                                                                                                                                                                                                                                          |
|                      | Training courses                | Is the game used in training courses or - curricula?                           | No                                                                                                                                                                                                                                                                                                                                                                                                                                                                                                                                                                                                                                                                                                                                                                                                                                                                                                                                                                                                                                                                                                                                                                                                                                                                                                                                                                                                                                                                                                                                                                                                                                                                                                           |
|                      | SCORM compliancy                | If used in training courses or curricula, is the serious game SCORM-compliant? | NA                                                                                                                                                                                                                                                                                                                                                                                                                                                                                                                                                                                                                                                                                                                                                                                                                                                                                                                                                                                                                                                                                                                                                                                                                                                                                                                                                                                                                                                                                                                                                                                                                                                                                                           |
| <u>Functionality</u> |                                 |                                                                                |                                                                                                                                                                                                                                                                                                                                                                                                                                                                                                                                                                                                                                                                                                                                                                                                                                                                                                                                                                                                                                                                                                                                                                                                                                                                                                                                                                                                                                                                                                                                                                                                                                                                                                              |
|                      | Purposes / didactic features    | For every purpose of the game:                                                 |                                                                                                                                                                                                                                                                                                                                                                                                                                                                                                                                                                                                                                                                                                                                                                                                                                                                                                                                                                                                                                                                                                                                                                                                                                                                                                                                                                                                                                                                                                                                                                                                                                                                                                              |
|                      | Learning or behavioural goals   | What content will the player learn?                                            | Learning content is based on a reference set of values that manifest in (pro-social) thought and behaviour. These values correspond with the 'perfections' of Mahayana Buddhism. Learning this content is, for research purposes, interpreted as a process of psychological well-being through self-awareness, self-regulation, and self-transcendence (see developer assumptions).                                                                                                                                                                                                                                                                                                                                                                                                                                                                                                                                                                                                                                                                                                                                                                                                                                                                                                                                                                                                                                                                                                                                                                                                                                                                                                                          |
|                      | Relation learning and game play | How does the learning content relate to the game play?                         | <p>Players are supported in imagining how valued states (or 'selves') are attainable when going on a trip around the world (as a metaphor for private, social, or work participation). Before the game starts, players are explicitly instructed to identify with an Avatar (of their chosen gender and name). It is stated that Avatar choices reflect you as a player. In an introductory cut-scene, this Avatar meets a non-playing character (NPC), named LAKA. The personal Avatar is introduced as someone who experienced deterioration in physical and social domains of functioning, and is determined to improve his/her life. Then, LAKA challenges the Avatar 'to cope well with others' on a trip to 4 destinations (London, Turkey, Asia, and Africa). Meanwhile, most of the mechanics of LAKA enable (virtual) exploration and affirmation of values by selecting action plans for the personal Avatar. At each travel destination, the Avatar faces 4 encounters with NPC's under various circumstances. These encounters are designed as complex interactions between Avatar actions and unpredictable responses of the NPC/environment (rendering variety in cultural settings). For each Avatar action, players select an action plan out of 5 programmed options for physical acting, saying, and/or avoiding. The action plans are modelled by their level of correspondence with values for a given situation.</p> <p>After visiting a destination (after 4 encounters), LAKA appears and asks the Avatar to provide a self-rating of his/her performance, provides feedback on chosen action plans (by giving a certain number of puzzle pieces), and feeds back how well Avatar</p> |

|    |                               |                                                                                           |                                                                                                                                                                                                                                                                                                                                                                                                                                                                                                                                                                                                                                                                                                                                                                                                                                                                                                                     |
|----|-------------------------------|-------------------------------------------------------------------------------------------|---------------------------------------------------------------------------------------------------------------------------------------------------------------------------------------------------------------------------------------------------------------------------------------------------------------------------------------------------------------------------------------------------------------------------------------------------------------------------------------------------------------------------------------------------------------------------------------------------------------------------------------------------------------------------------------------------------------------------------------------------------------------------------------------------------------------------------------------------------------------------------------------------------------------|
| 1  |                               |                                                                                           | self-ratings and LAKA ratings correspond (by providing additional puzzle pieces).<br>Finally, LAKA delivers focused attention and open monitoring exercises (explaining and illustrating how to practice meditation, prompting practice, providing a means for stress management).<br>Learning elements are interspersed with short (casual) action and puzzle games, images, and information associated with the location of the Avatar. These features promote enjoyment by varying game play and rewarding curiosity, and can be skipped if preferred.                                                                                                                                                                                                                                                                                                                                                           |
| 2  |                               |                                                                                           |                                                                                                                                                                                                                                                                                                                                                                                                                                                                                                                                                                                                                                                                                                                                                                                                                                                                                                                     |
| 3  |                               |                                                                                           |                                                                                                                                                                                                                                                                                                                                                                                                                                                                                                                                                                                                                                                                                                                                                                                                                                                                                                                     |
| 4  |                               |                                                                                           |                                                                                                                                                                                                                                                                                                                                                                                                                                                                                                                                                                                                                                                                                                                                                                                                                                                                                                                     |
| 5  |                               |                                                                                           |                                                                                                                                                                                                                                                                                                                                                                                                                                                                                                                                                                                                                                                                                                                                                                                                                                                                                                                     |
| 6  |                               |                                                                                           |                                                                                                                                                                                                                                                                                                                                                                                                                                                                                                                                                                                                                                                                                                                                                                                                                                                                                                                     |
| 7  | Instruction                   | What intervention leads to the learning transition (eg, tutorial, instructions (in-game)) | Besides prompting identification with the Avatar, and adding feedback by LAKA as a form of in-game debriefing, face-to-face debriefings by care providers are offered to improve the transition from game play to learning for daily life improvements.                                                                                                                                                                                                                                                                                                                                                                                                                                                                                                                                                                                                                                                             |
| 8  |                               |                                                                                           |                                                                                                                                                                                                                                                                                                                                                                                                                                                                                                                                                                                                                                                                                                                                                                                                                                                                                                                     |
| 9  | Assessment (progress) in game | Through which parameters is progress in the game measured?                                | Number of encounters completed (progress does not depend on player learning level), but feedback is provided on actions chosen by players.                                                                                                                                                                                                                                                                                                                                                                                                                                                                                                                                                                                                                                                                                                                                                                          |
| 10 |                               |                                                                                           |                                                                                                                                                                                                                                                                                                                                                                                                                                                                                                                                                                                                                                                                                                                                                                                                                                                                                                                     |
| 11 | Assessment parameters         | Which parameters are to designers' opinion indicative for measuring learning effects?     | Primary health outcomes (i.e. pain, fatigue) may be an indirect result of learning. Parameters that may indicate a learning effect more directly may be plausible mediators of outcome improvement after behavioural interventions in CP or FSS patients (see developer assumptions). Parameters of game play may also directly reflect learning effects: 1) LAKA assessments may reflect whether a patient thinks and acts in accordance with values, 2) the level of correspondence between self-assessment and LAKA assessment may contain information about the extent to which the player understands what sort of thinking and behaviour relates to psychological well-being.                                                                                                                                                                                                                                 |
| 12 |                               |                                                                                           |                                                                                                                                                                                                                                                                                                                                                                                                                                                                                                                                                                                                                                                                                                                                                                                                                                                                                                                     |
| 13 |                               |                                                                                           |                                                                                                                                                                                                                                                                                                                                                                                                                                                                                                                                                                                                                                                                                                                                                                                                                                                                                                                     |
| 14 |                               |                                                                                           |                                                                                                                                                                                                                                                                                                                                                                                                                                                                                                                                                                                                                                                                                                                                                                                                                                                                                                                     |
| 15 |                               |                                                                                           |                                                                                                                                                                                                                                                                                                                                                                                                                                                                                                                                                                                                                                                                                                                                                                                                                                                                                                                     |
| 16 |                               |                                                                                           |                                                                                                                                                                                                                                                                                                                                                                                                                                                                                                                                                                                                                                                                                                                                                                                                                                                                                                                     |
| 17 |                               |                                                                                           |                                                                                                                                                                                                                                                                                                                                                                                                                                                                                                                                                                                                                                                                                                                                                                                                                                                                                                                     |
| 18 |                               |                                                                                           |                                                                                                                                                                                                                                                                                                                                                                                                                                                                                                                                                                                                                                                                                                                                                                                                                                                                                                                     |
| 19 |                               |                                                                                           |                                                                                                                                                                                                                                                                                                                                                                                                                                                                                                                                                                                                                                                                                                                                                                                                                                                                                                                     |
| 20 |                               |                                                                                           |                                                                                                                                                                                                                                                                                                                                                                                                                                                                                                                                                                                                                                                                                                                                                                                                                                                                                                                     |
| 21 | Content Management            | Content Management system                                                                 | Is the Content Management System restricted to specified persons or institutions?                                                                                                                                                                                                                                                                                                                                                                                                                                                                                                                                                                                                                                                                                                                                                                                                                                   |
| 22 |                               |                                                                                           | Yes                                                                                                                                                                                                                                                                                                                                                                                                                                                                                                                                                                                                                                                                                                                                                                                                                                                                                                                 |
| 23 |                               | User uploaded content                                                                     | If no, are users allowed to upload their own content?                                                                                                                                                                                                                                                                                                                                                                                                                                                                                                                                                                                                                                                                                                                                                                                                                                                               |
| 24 |                               |                                                                                           | NA                                                                                                                                                                                                                                                                                                                                                                                                                                                                                                                                                                                                                                                                                                                                                                                                                                                                                                                  |
| 25 |                               | Content monitoring                                                                        | How is uploaded content checked?                                                                                                                                                                                                                                                                                                                                                                                                                                                                                                                                                                                                                                                                                                                                                                                                                                                                                    |
| 26 |                               |                                                                                           | NA                                                                                                                                                                                                                                                                                                                                                                                                                                                                                                                                                                                                                                                                                                                                                                                                                                                                                                                  |
| 27 |                               | Restrictions and limits of the serious game                                               | Please describe restrictions and limits of the serious game. What content on the learning goals is not covered?                                                                                                                                                                                                                                                                                                                                                                                                                                                                                                                                                                                                                                                                                                                                                                                                     |
| 28 |                               |                                                                                           | The game itself does not contain detailed explicit knowledge on relationships between learning content and health outcomes. Complementary delivery modes of rehabilitation (i.e. handbooks, group therapy sessions) serve this purpose. An argument for withholding highly explicit feedback is that the adequacy of action plans (coping) is context dependent. The game enables safe exploration of options for (non-automatic) responding to contextual clues. Consequently, the game triggers reflection by leaving some ambiguity about what might be the 'right' sort of behaviour.<br>This ambiguity might diminish levels of acceptance/playability (perceptions on feedback or challenge) in some players. Professional support may partially compensate this issue when embedding the game within regular treatment. The game was found to be engaging enough to play ones or twice (2-5 hours), which is |
| 29 |                               |                                                                                           |                                                                                                                                                                                                                                                                                                                                                                                                                                                                                                                                                                                                                                                                                                                                                                                                                                                                                                                     |
| 30 |                               |                                                                                           |                                                                                                                                                                                                                                                                                                                                                                                                                                                                                                                                                                                                                                                                                                                                                                                                                                                                                                                     |
| 31 |                               |                                                                                           |                                                                                                                                                                                                                                                                                                                                                                                                                                                                                                                                                                                                                                                                                                                                                                                                                                                                                                                     |
| 32 |                               |                                                                                           |                                                                                                                                                                                                                                                                                                                                                                                                                                                                                                                                                                                                                                                                                                                                                                                                                                                                                                                     |
| 33 |                               |                                                                                           |                                                                                                                                                                                                                                                                                                                                                                                                                                                                                                                                                                                                                                                                                                                                                                                                                                                                                                                     |
| 34 |                               |                                                                                           |                                                                                                                                                                                                                                                                                                                                                                                                                                                                                                                                                                                                                                                                                                                                                                                                                                                                                                                     |
| 35 |                               |                                                                                           |                                                                                                                                                                                                                                                                                                                                                                                                                                                                                                                                                                                                                                                                                                                                                                                                                                                                                                                     |
| 36 |                               |                                                                                           |                                                                                                                                                                                                                                                                                                                                                                                                                                                                                                                                                                                                                                                                                                                                                                                                                                                                                                                     |
| 37 |                               |                                                                                           |                                                                                                                                                                                                                                                                                                                                                                                                                                                                                                                                                                                                                                                                                                                                                                                                                                                                                                                     |
| 38 |                               |                                                                                           |                                                                                                                                                                                                                                                                                                                                                                                                                                                                                                                                                                                                                                                                                                                                                                                                                                                                                                                     |
| 39 |                               |                                                                                           |                                                                                                                                                                                                                                                                                                                                                                                                                                                                                                                                                                                                                                                                                                                                                                                                                                                                                                                     |
| 40 |                               |                                                                                           |                                                                                                                                                                                                                                                                                                                                                                                                                                                                                                                                                                                                                                                                                                                                                                                                                                                                                                                     |
| 41 |                               |                                                                                           |                                                                                                                                                                                                                                                                                                                                                                                                                                                                                                                                                                                                                                                                                                                                                                                                                                                                                                                     |
| 42 |                               |                                                                                           |                                                                                                                                                                                                                                                                                                                                                                                                                                                                                                                                                                                                                                                                                                                                                                                                                                                                                                                     |
| 43 |                               |                                                                                           |                                                                                                                                                                                                                                                                                                                                                                                                                                                                                                                                                                                                                                                                                                                                                                                                                                                                                                                     |
| 44 |                               |                                                                                           |                                                                                                                                                                                                                                                                                                                                                                                                                                                                                                                                                                                                                                                                                                                                                                                                                                                                                                                     |
| 45 |                               |                                                                                           |                                                                                                                                                                                                                                                                                                                                                                                                                                                                                                                                                                                                                                                                                                                                                                                                                                                                                                                     |
| 46 |                               |                                                                                           |                                                                                                                                                                                                                                                                                                                                                                                                                                                                                                                                                                                                                                                                                                                                                                                                                                                                                                                     |
| 47 |                               |                                                                                           |                                                                                                                                                                                                                                                                                                                                                                                                                                                                                                                                                                                                                                                                                                                                                                                                                                                                                                                     |
| 48 |                               |                                                                                           |                                                                                                                                                                                                                                                                                                                                                                                                                                                                                                                                                                                                                                                                                                                                                                                                                                                                                                                     |
| 49 |                               |                                                                                           |                                                                                                                                                                                                                                                                                                                                                                                                                                                                                                                                                                                                                                                                                                                                                                                                                                                                                                                     |



|                                 |                                 |                                                                                                    |                                                                                                                                                                                                                                                                                                                                                                                                                                                                             |
|---------------------------------|---------------------------------|----------------------------------------------------------------------------------------------------|-----------------------------------------------------------------------------------------------------------------------------------------------------------------------------------------------------------------------------------------------------------------------------------------------------------------------------------------------------------------------------------------------------------------------------------------------------------------------------|
|                                 |                                 |                                                                                                    | not expected to be enough for moderate or strong average effects on player behaviour and health outcomes.                                                                                                                                                                                                                                                                                                                                                                   |
| Potentially undesirable effects | Potentially undesirable effects | What potential undesirable effects could the game have?                                            | No undesirable effects were expected and none were observed in qualitative analysis during a feasibility study* <sup>3</sup> .                                                                                                                                                                                                                                                                                                                                              |
|                                 | Disclosure                      | Are such potential undesirable effects disclosed to the user?                                      | NA                                                                                                                                                                                                                                                                                                                                                                                                                                                                          |
|                                 | Measures taken                  | What measures are taken to prevent potential undesirable effects?                                  | Based on the result of feasibility study, we expect no undesirable effects. During the present evaluations, undesirable effects will be investigated again.                                                                                                                                                                                                                                                                                                                 |
| <u>Validity</u>                 |                                 |                                                                                                    |                                                                                                                                                                                                                                                                                                                                                                                                                                                                             |
| Design process                  | Medical expert complicity       | Were medical experts (content experts) involved in the design process from the start?              | Lama's from the Tibetan Institute Yeunten Ling, a psychometric expert; A.H. Akkerman, and Ciran; A.H.M.M. van Bergen, and J.J. Jochijms created the 'mobility of mind' questionnaire that operationalizes the content on which LAKA is based. They were also involved in the formulation of program requirements, or provided feedback on prototypes of LAKA.                                                                                                               |
|                                 | User group complicity           | Were representatives from the user group involved in the design process from the start?            | No                                                                                                                                                                                                                                                                                                                                                                                                                                                                          |
|                                 | Educationalist complicity       | Were educationalists involved in the design process from the start?                                | Educationalists have been affiliated with Tilburg University: Prof. Jac L.A. Geurts (gaming expert) had been guiding the process of demand specifications for LAKA. M.A.P. Vugts MSc has been involved as a researcher from the start.                                                                                                                                                                                                                                      |
| User testing                    | User testing                    | Did user testing take place? What were the results, and how were these incorporated in the design? | User testing was performed in feasibility piloting* <sup>3</sup> . The game is free of technical issues. Some comments on playability have not been addressed, because their impacts on outcomes are ambiguous. The only change to the version used in the feasibility study is that mini-games can be skipped after one failed attempt (instead of 3) to increase tailoring to user preferences.                                                                           |
| Stability                       | Platform stability              | Does the game produce the same results on different platforms?                                     | Yes                                                                                                                                                                                                                                                                                                                                                                                                                                                                         |
| Validity (effectiveness)        | Face validity                   | Do educators and trainees view it as a valid way of instruction?                                   | Yes. Educators agree that learning content is integrated in a valid way (according to the creators of the Mobility of Mind model (see 'content validity'), and agree that its content corresponds with processes of mental well-being as described by the S-ART model (MV, AZ). A group of self-selected patient users recognize that learning content correspond to what is learned by other means (from psychotherapists) during the rehabilitation program* <sup>3</sup> |

|                                                                      |                             |                                                                                                       |                                                                                                                                                                                                                                                                                                                                                                                                                                                                                                                                                                                                                                                                                                                                                                                                                                                                                                                                                                                                                      |
|----------------------------------------------------------------------|-----------------------------|-------------------------------------------------------------------------------------------------------|----------------------------------------------------------------------------------------------------------------------------------------------------------------------------------------------------------------------------------------------------------------------------------------------------------------------------------------------------------------------------------------------------------------------------------------------------------------------------------------------------------------------------------------------------------------------------------------------------------------------------------------------------------------------------------------------------------------------------------------------------------------------------------------------------------------------------------------------------------------------------------------------------------------------------------------------------------------------------------------------------------------------|
| 1<br>2<br>3<br>4<br>5<br>6<br>7<br>8                                 | Content validity            | How is its content validated to be complete, correct, and nothing but the intended medical construct? | A structured self-report questionnaire to assess thought and behaviour in correspondence with values as defined in the teaching model of the 6 perfections was created by Ciran in collaboration with the Yeunten Ling institute (Belgium). A validation report on this test was assessed by an independent Dutch commission for test affairs (COTAN). It was found that questionnaire scores have good reliability, and are strongly correlated with psychological well-being (as expected). Game scenarios were constructed by a professional writer who was familiar with the model and made explicit references to questionnaire items within screen plays for content validity checks. The quality of scenario's and operationalization was monitored under supervision of a creator of the test.                                                                                                                                                                                                               |
| 9<br>10                                                              | Construct validity          | Is the game able to measure differences in skills it intends to measure?                              | Research in progress                                                                                                                                                                                                                                                                                                                                                                                                                                                                                                                                                                                                                                                                                                                                                                                                                                                                                                                                                                                                 |
| 11<br>12<br>13<br>14<br>15<br>16<br>17<br>18<br>19<br>20<br>21<br>22 | Concurrent validity         | How does learning outcome compare to other methods assessing the same medical construct?              | Concurrent validity was studied using unreported data that were collected in the pilot phase (n=67 patients). A preliminary measure of game score was calculated as the average of all chosen action plans (the quality of each action plan is scaled ordinal; 0, 1, 2, 3, or 4). Performance was assessed by summing the scores for 5 scales corresponding with the behavioural domains of the values questionnaire (generosity, moral discipline, patience, enthusiastic perseverance, and mental stability). Pearson correlations between game scores and the behavioural domain of the values questionnaire were found to be significant, and of a small to moderate size. Self-assessed values measured at baseline (measured within a month before playing the game) correlated .29 with game scores. Values measured post-intervention (1-2 months after playing the game) correlated .39 with game scores. This agreement is encouraging given the differences in how to construct indicators were measured. |
| 23<br>24                                                             | Predictive validity         | Does playing the game predict skills improvement in real life?                                        | Research in progress                                                                                                                                                                                                                                                                                                                                                                                                                                                                                                                                                                                                                                                                                                                                                                                                                                                                                                                                                                                                 |
| 25                                                                   | <u>Data protection</u>      |                                                                                                       |                                                                                                                                                                                                                                                                                                                                                                                                                                                                                                                                                                                                                                                                                                                                                                                                                                                                                                                                                                                                                      |
| 26<br>27<br>28<br>29                                                 | Data protection and privacy | Data processing                                                                                       | How is data collected in the serious game?                                                                                                                                                                                                                                                                                                                                                                                                                                                                                                                                                                                                                                                                                                                                                                                                                                                                                                                                                                           |
| 30<br>31<br>32                                                       | Patient privacy             | Are patient-specific data stored in the game?                                                         | The game can only be accessed by clients of Ciran by logging in with their treatment ID number and self-chosen password. Log-data are encrypted, send over the internet, and stored by Ciran to save proceedings and enable feedback of game scores. No patient-specific data are stored on devices.<br><br>Data are recorded by Ciran includes IP addresses, name given to the Avatar (no name, or alias is possible), which could be used to identify users.                                                                                                                                                                                                                                                                                                                                                                                                                                                                                                                                                       |

|  |                            |                                                                                             |                                                                                                                                                                                                                                                                                                                                                                                                                                                                                                                                                                                                                                                                                                            |
|--|----------------------------|---------------------------------------------------------------------------------------------|------------------------------------------------------------------------------------------------------------------------------------------------------------------------------------------------------------------------------------------------------------------------------------------------------------------------------------------------------------------------------------------------------------------------------------------------------------------------------------------------------------------------------------------------------------------------------------------------------------------------------------------------------------------------------------------------------------|
|  |                            | If yes, are patient informed consent criteria met according to relevant national standards? | Yes. All clients at Ciran are informed before the start of their treatment about the use of a digital tracking system for creating and maintaining a patient record, and about their rights for managing their personal records. Therefore, game data concern progress of the treatment and can only be used for scientific research under strict conditions. Therefore, a research protocol describing the codified processing of log-data (thus not including potentially patient specific IP addresses and Avatar names) for the evaluation of LAKA was approved by the ethical committee of Tilburg School of Social and Behavioural Sciences. Medical ethics review is not required for the research. |
|  | Data ownership             | Who owns and stores the data resulting from play?                                           | Ciran                                                                                                                                                                                                                                                                                                                                                                                                                                                                                                                                                                                                                                                                                                      |
|  | Data storage period        | During what period are data stored?                                                         | In accordance with the legal storage of medical records (15 years)                                                                                                                                                                                                                                                                                                                                                                                                                                                                                                                                                                                                                                         |
|  | Data removal               | Can the user delete data temporarily and/or permanently?                                    | Yes                                                                                                                                                                                                                                                                                                                                                                                                                                                                                                                                                                                                                                                                                                        |
|  | Data storage security      | Is the data storage secured in conformity with laws of the countries stated above?          | Yes                                                                                                                                                                                                                                                                                                                                                                                                                                                                                                                                                                                                                                                                                                        |
|  | Data transmission security | Is the data transmission secured in conformity with laws of the countries stated above?     | Yes                                                                                                                                                                                                                                                                                                                                                                                                                                                                                                                                                                                                                                                                                                        |
|  | Disclosure                 | Are all items on "data protection" disclosed to the user?                                   | Yes. All items are disclosed to patients before starting their treatment. Specific information on the storage of game data for progress tracking and feedback have not been highlighted in the consent procedure.                                                                                                                                                                                                                                                                                                                                                                                                                                                                                          |

\*<sup>1</sup> Prototype trailer (English): <http://www.ciran.nl/laka/lakaEnglish.php>; Trailer of the experimental version of the game (Dutch): <http://www.ciran.nl/laka/lakaNed.php>

\*<sup>2</sup> <https://www.ciran.nl/>

\*<sup>3</sup> Vugts MA, Joosen MC, van Bergen AH, et al. Feasibility of Applied Gaming During Interdisciplinary Rehabilitation for Patients With Complex Chronic Pain and Fatigue Complaints: A Mixed-Methods Study. *JMIR serious games* 2016;**4**(1).

1. Organization WH. *International Classification of Functioning, Disability and Health: ICF*: World Health Organization, 2001.
2. McCracken LM, Morley S. The psychological flexibility model: A basis for integration and progress in psychological approaches to chronic pain management. *The Journal of Pain* 2014;**15**(3):221-34.
3. Ryff CD, Singer BH. Know thyself and become what you are: A eudaimonic approach to psychological well-being. *Journal of happiness studies* 2008;**9**(1):13-39.
4. Martela F, Ryan RM. Prosocial behavior increases well-being and vitality even without contact with the beneficiary: Causal and behavioral evidence. *Motivation and Emotion* 2016;**40**(3):351-57.
5. Weinstein N, Ryan RM. When helping helps: autonomous motivation for prosocial behavior and its influence on well-being for the helper and recipient. *Journal of personality and social psychology* 2010;**98**(2):222.
6. Vago DR, David SA. Self-awareness, self-regulation, and self-transcendence (S-ART): a framework for understanding the neurobiological mechanisms of mindfulness. *Frontiers in human neuroscience* 2012;**6**:296.

15 7. Zautra AJ, Johnson LM, Davis MC. Positive affect as a source of resilience for women in chronic pain. Journal of consulting and clinical psychology  
16 2005;**73**(2):212.

1 17 8. Baranowski T, Buday R, Thompson DI, et al. Playing for real: video games and stories for health-related behavior change. American journal of preventive  
2 18 medicine 2008;**34**(1):74-82. e10.

3 19 9. Przybylski AK, Weinstein N, Murayama K, et al. The ideal self at play the appeal of video games that let you be all you can be. Psychological science  
4 20 2012;**23**(1):69-76.

5 21 10. Kim B, Park H, Baek Y. Not just fun, but serious strategies: Using meta-cognitive strategies in game-based learning. Computers & Education 2009;**52**(4):800-  
6 22 10.

7  
8 23

For peer review only

# BMJ Open

## **Serious gaming during multidisciplinary rehabilitation for patients with complex chronic pain or fatigue complaints: study protocol for a controlled trial and process evaluation**

|                                 |                                                                                                                                                                                                                                                                                                                                                                                                 |
|---------------------------------|-------------------------------------------------------------------------------------------------------------------------------------------------------------------------------------------------------------------------------------------------------------------------------------------------------------------------------------------------------------------------------------------------|
| Journal:                        | <i>BMJ Open</i>                                                                                                                                                                                                                                                                                                                                                                                 |
| Manuscript ID                   | bmjopen-2017-016394.R1                                                                                                                                                                                                                                                                                                                                                                          |
| Article Type:                   | Protocol                                                                                                                                                                                                                                                                                                                                                                                        |
| Date Submitted by the Author:   | 07-Apr-2017                                                                                                                                                                                                                                                                                                                                                                                     |
| Complete List of Authors:       | Vugts, Miel; Tilburg University, Tranzo<br>Joosen, Margot; Tilburg University, Tilburg School of Social and Behavioral Sciences, Tranzo Scientific Center for Care and Welfare<br>Mert, Agali; Centra voor Integrale Revalidatie en Arbeidsactivering Nederland,<br>Zedlitz, Aglaia; Universiteit Leiden, Health, medical and neuropsychology<br>Vrijhoef, Hubertus; Tilburg University, Tranzo |
| <b>Primary Subject Heading</b>: | Rehabilitation medicine                                                                                                                                                                                                                                                                                                                                                                         |
| Secondary Subject Heading:      | Rheumatology, Research methods, Mental health                                                                                                                                                                                                                                                                                                                                                   |
| Keywords:                       | Rehabilitation medicine < INTERNAL MEDICINE, MENTAL HEALTH, PAIN MANAGEMENT, QUALITATIVE RESEARCH, Information technology < BIOTECHNOLOGY & BIOINFORMATICS                                                                                                                                                                                                                                      |
|                                 |                                                                                                                                                                                                                                                                                                                                                                                                 |

SCHOLARONE™  
Manuscripts

Only

1  
2  
3 1 Study Protocol  
4  
5 2

6 3 **Serious gaming during multidisciplinary rehabilitation for patients with complex chronic pain or**  
7 4 **fatigue complaints: study protocol for a controlled trial and process evaluation**  
8  
9 5

10 6 Miel A P Vugts MSc\*

11 7 Tilburg University, Tilburg School of Social and Behavioural Sciences, Tranzo Scientific Centre for Care  
12 8 and Welfare;

13 9 Ciran Rehabilitation Centres, Venlo, the Netherlands  
14 9

15 10  
16 11 Margot C W Joosen PhD

17 12 Tilburg University, Tilburg School of Social and Behavioural Sciences, Tranzo Scientific Centre for Care  
18 13 and Welfare  
19 13

20 14  
21 15 Agali Mert PhD

22 16 Ciran Rehabilitation Centres, Venlo, the Netherlands  
23 16  
24 17

25 18  
26 19 Aglaia M E Zedlitz PhD

27 20 Leiden University, Department of Health Medical and Neuropsychology, Leiden Institute for Brain and  
28 21 Cognition  
29 21

30 22  
31 23 Hubertus J M Vrijhoef PhD

32 24 Tilburg University, Tilburg School of Social and Behavioural Sciences, Tranzo Scientific Centre for Care  
33 25 and Welfare, the Netherlands;

34 26 Maastricht University Medical Centre, Department of Patient & Care, the Netherlands;

35 27 Vrije Universiteit Brussels, Department of Family Medicine, Belgium  
36 27  
37 27

38 28 \*Corresponding author: Miel A P Vugts MSc. PhD Candidate, Tilburg University, Tilburg School of  
39 29 Behavioural Sciences, Tranzo, P.O. Box 90153, Tilburg 5000 LE, The Netherlands. Tel: +31 13 466  
40 30 8271; e-mail: m.a.p.vugts@tilburguniversity.edu  
41 30  
42 31

43 32  
44 33 KEYWORDS: Chronic pain, functional somatic syndrome, serious gaming, multidisciplinary rehabilitation  
45 33  
46 34

47 35 Version 2.0 (05/04/2017)

48 36 Number of words: 4253  
49 36  
50 36  
51 37  
52  
53  
54  
55  
56  
57  
58  
59  
60

**ABSTRACT****Introduction:**

Many individuals suffer from chronic pain or functional somatic syndromes and face boundaries for diminishing functional limitations by means of bio-psychosocial interventions. Serious gaming could complement multidisciplinary interventions through enjoyment and independent accessibility. A study protocol is presented for studying whether, how, for which patients, and under what circumstances, serious gaming improves patient health outcomes during regular multidisciplinary rehabilitation.

**Methods and analysis:**

A mixed-methods design is described that prioritizes a 2-armed naturalistic quasi-experiment. An experimental group is composed of patients who follow serious gaming during an outpatient multidisciplinary programme at two sites of a Dutch rehabilitation centre. Control group patients follow the same programme without serious gaming in two similar sites. Multivariate mixed modelling analysis is planned for assessing how much variance in 250 patient records of routinely monitored pain intensity, pain coping and cognition, fatigue, and psychopathology outcomes is attributable to serious gaming. Embedded qualitative methods include unobtrusive collection and analyses of stakeholder focus group interviews, participant feedback, and semi-structured patient interviews. Process analyses are carried out by a systematic approach of mixing qualitative and quantitative methods at various stages of the research.

**Ethics and dissemination:**

The Ethics Committee of the Tilburg School of Social and Behavioural Sciences approved the research after reviewing the protocol for the protection of patients' interests in conformity to the letter and rationale of the applicable laws and research practice (EC 2016.25t). Findings will be presented in research articles and international scientific conferences.

**Trial registration:**

A protocol for the naturalistic quasi-experimental outcome evaluation was entered in the Dutch trial register (NTR6020).

**ARTICLE SUMMARY****Strengths and limitations of this study**

- The novelty of the intervention and study methods is a strength.
- Using a pragmatic approach to study serious gaming when deployed in a regular health care setting enables to understand under what conditions serious gaming will (not) work.
- Study limitations come with the naturalistic design, due to pragmatic reasons, that prevents random treatment assignment and stringent diagnostic methods.

## 1 INTRODUCTION

### 2 Background and rationale

3 Video games are vividly debated to their behavioural and clinical outcomes, which may be negative or  
4 positive depending on game content and player attributes.<sup>1 2</sup> Serious (health) games primarily target  
5 promotion of health benefits.<sup>3</sup> A new serious game, called LAKA, aims to facilitate patient learning about  
6 living with complex chronic somatic complaints.<sup>4</sup> Based on the results of a feasibility study, LAKA is  
7 deployed in a regular health care setting, as an additional component of outpatient multidisciplinary  
8 rehabilitation. The current protocol presents an innovative mixed-methods study for gaining insight into  
9 the effectiveness of serious gaming as a complementary modality during regular multidisciplinary  
10 rehabilitation.

11 Using a variety of definitions and measures of pain and disability, the worldwide prevalence  
12 estimates for chronic pain range between 7% and 64%.<sup>5-9</sup> Individuals are in chronic pain (CP) when  
13 complaints persist beyond the usual 3 to 6 months of organic recovery.<sup>10</sup> Functional somatic syndromes  
14 (FSS) are diagnosed in individuals that seek medical help for functional disturbance and chronic somatic  
15 symptoms without a satisfactory explanation by organ pathology or disease.<sup>11</sup> CP and FSS may have a  
16 biological explanation in central nervous system sensitization.<sup>12 13</sup> Predisposition to these disorders is  
17 probably determined by a combination of genetic factors and personality characteristics.<sup>14 15</sup> Symptom  
18 patterns are often precipitated by trauma or social factors.<sup>16-18</sup> Maladaptive thoughts, feelings, and  
19 behaviour are assumed to maintain the symptoms.<sup>17 19-21</sup> Regarding treatment, support has been found  
20 for a stepped care approach with active bio-psychosocial treatment when mono-disciplinary treatments  
21 are insufficient.<sup>17</sup> Randomized controlled trials that compared symptoms and functioning after  
22 multidisciplinary rehabilitation versus alternative treatments in patients with CP or chronic fatigue  
23 syndrome generally reported up to medium-sized differences.<sup>22-25</sup> Nonetheless, recent research  
24 addresses improvement of bio-psychosocial intervention models,<sup>26 27</sup> 'matching' and 'blending'  
25 therapeutic strategies and delivery modes,<sup>28 29</sup> and promotion of patient engagement.<sup>30</sup> As such, access,  
26 reach, adherence and effectiveness of bio-psychosocial interventions may be enhanced.

27 Serious gaming could be of aid here. Previously investigated strategies are 'exergaming' to  
28 improve motivation for physical activity,<sup>31</sup> 'brain training games' against dullness in the remediation of  
29 cognitive functions,<sup>32</sup> 'virtual reality' for safety in graded activity or exposure,<sup>33</sup> and 'health behaviour  
30 gaming' for fun while addressing behavioural antecedents.<sup>3</sup> In the fields of rehabilitation and pain  
31 management, virtual environments have shown promise in reducing acute pain by distraction, or in  
32 activity management to restore physical functioning.<sup>34 35</sup> Despite of promising results for various mono-  
33 disciplinary applications of gaming and simulation, no evident application seems to exist for supporting  
34 biopsychosocial adjustment processes in patients with CP or FSS.<sup>2 3 32-37</sup> Outcome improvement after  
35 treatment in CP or FSS patients may be mediated by changes in aspects of self (beliefs about illness and  
36 fear avoidance, catastrophizing, and psychological flexibility), coping behaviour, and affect.<sup>38 39</sup> Features  
37 that distinguish serious games from traditional modes include covert learning techniques, interactivity,  
38 storytelling, sound effects, visuals, and 'debriefings'. They could offer relative benefits for behavioural  
39 change processes through distinctive attentional (presence), affective (enjoyment), and meta-cognitive  
40 processes.<sup>40-43</sup> Further research into gaming mechanisms is needed,<sup>42</sup> and may also inform about how  
41 biopsychosocial intervention mechanisms could be strengthened'.



1  
2  
3  
4  
5  
6  
7  
8  
9  
10  
11  
12  
13  
14  
15  
16  
17  
18  
19  
20  
21  
22  
23  
24  
25  
26  
27  
28  
29  
30  
31  
32  
33  
34  
35  
36  
37  
38  
39  
40  
41  
42  
43  
44  
45  
46  
47  
48  
49  
50  
51  
52  
53  
54  
55  
56  
57  
58  
59  
60

1  
2  
3  
4  
5  
6  
7  
8  
9  
10  
11  
12  
13  
14  
15  
16  
17  
18  
19  
20  
21  
22  
23  
24  
25  
26  
27  
28  
29  
30  
31  
32  
33  
34  
35  
36  
37  
38  
39  
40  
41  
42  
43  
44  
45  
46  
47  
48  
49  
50  
51  
52  
53  
54  
55  
56  
57  
58  
59  
60

However, within the outcome evaluation of multidisciplinary interventions several complicating factors arise. These consist of outcome multidimensionality and dependency on implementation in actual health care settings.<sup>44 45</sup> In other words, characteristics at the levels of organization, care providers, patients and interventions all affect outcome levels.<sup>46 47</sup> Therefore, ideally, multiple sources of information are used to evaluate to what extent, for whom, when and under what circumstances an innovation of multidisciplinary treatment improves outcomes in patients with CP or FSS.<sup>48 49</sup> For example, some intervention studies show different outcomes of a computer delivered therapy when applied in different countries.<sup>50</sup> This is also an important issue for the outcomes of serious gaming, which are clearly sensitive to context factors.<sup>51 52</sup> Therefore, 'debriefings' are suggested as a method for discussing and exploiting game-play experiences and strengthening learning outcomes.<sup>53</sup> Previous studies leave uncertainties about how to effectively organize instructional support, i.e. via software or delivered by (trained) health care staff, via internet or face-to-face, in groups or individually. There is strong consensus that adequately powered clinical trials are needed to determine the effectiveness of serious gaming.<sup>2 3 37</sup> Moreover, pragmatic trials and realist evaluation principles are needed to determine how serious gaming relates to patient outcomes depending on how it is deployed in actual health care settings.

### 18 **Study aims**

19 Here we describe the protocol for outcome and process evaluations of complementary serious gaming during regular multidisciplinary rehabilitation for patients with CP or FSS, which holds three study aims. 20 The first aim is to investigate the effectiveness of serious gaming as a treatment complement. We 21 question to what extent multidisciplinary rehabilitation with an additional serious gaming component is 22 more effective than multidisciplinary rehabilitation without serious gaming for symptom reduction and 23 clinically relevant improvement. Primarily, interdependent outcome domains of pain, fatigue, and 24 emotional functioning (pain intensity, pain coping and cognition, fatigue complaints, and psychological 25 distress) are studied, because they are considered to be relevant and plausible for the intervention and 26 population.<sup>27 45</sup> Secondary outcomes are patients' impression of overall improvement, general subjective 27 health, and satisfaction with functioning and treatment. 28

29 Secondly, we aim to understand which innovation, patient, provider, and organization level 30 factors influence the outcomes of serious gaming for patients. Innovation level factors could be design 31 quality and compatibility with user routines. Patient level facilitators or barriers could be demographic, 32 health status and intervention history factors. Serious gaming outcomes could also depend on complex 33 provider behaviour by attitude, skill, and/or time constraints. Finally, outcomes of serious gaming could 34 be influenced by its organization in a clinical setting. Therefore, we pose the question: what are the 35 barriers and facilitators of outcome improvement through serious gaming according to patients, 36 providers, and other stakeholders? Furthermore, we question how variation in serious gaming outcomes 37 can be decomposed with plausible patient level differences and/or delivery conditions within the 38 treatment setting (i.e. size of a debriefing group).

39 The third aim concerns *how* serious gaming contributes to patient outcomes. For this, we 40 explore various serious gaming mechanisms, being the subjective experiences and objective 41 performances in context that may affect health outcomes. In addition, plausible linear effects between

1  
2  
3 1 mechanisms and patient outcome variables are investigated. Achievement of all three research aims will  
4 2 inform the further development of a valid and practical programme theory of serious gaming outcomes  
5 3 in regular health care for patients with CP or FSS.  
6 4

## 5 **METHODS AND ANALYSIS**

### 6 **Study design and procedure**

7 An embedded experimental mixed-methods design is created by an integrated multidisciplinary  
8 research team (MV, HV, MJ, AZ, AM) to address all three research aims in a single study (see figure 1).  
9 For studying the first research aim, which is to estimate patient level outcome improvement due to  
10 serious gaming during regular outpatient rehabilitation, a two-armed naturalistic quasi-experiment is  
11 prioritized (displayed at the centre of figure 1). A serious gaming intervention is deployed, for usage by  
12 all patients, at two sites of a Dutch outpatient rehabilitation clinic. Therefore, an intervention group is  
13 constituted of patients who receive the multidisciplinary rehabilitation programme with an additional  
14 serious gaming intervention. The control group consists of patients who simultaneously follow the same  
15 programme in two similar sites of the same clinic without serious gaming. Codified quantitative data  
16 from patient records will be retrieved and analysed to examine between group outcome differences.  
17 The protocol for the naturalistic quasi-experiment was entered in the Dutch trial register (NTR6020).  
18

19 *Figure 1: Overview of the Mixed-Methods design*  
20  
21

22 Embedding qualitative methods before, concurrently to, and after the quasi-experiment suits our  
23 second and third study aims. This mixed-method design is ideal for examining intervention processes,  
24 understanding mechanisms related to variables, and supporting programme theory development.<sup>54</sup>  
25 Herein, no intermediate qualitative results are communicated with providers and implementers during  
26 the experiment. Data collection started in April 2016 and is planned to end in March 2017, quantitative  
27 outcome data will be retrieved when concurrently collected qualitative data are analysed (February  
28 2017).  
29

### 30 **Recruitment**

#### 31 **Sites and professionals**

32 Two intervention sites where serious gaming is deployed participate in the study. For the recruitment of  
33 control subjects, two other sites (out of 18 sites as part of the same treatment centre) are selected  
34 based on similarity with regard to patient characteristics, facilities, protocols, history, personnel,  
35 location in or near a city in the southern Netherlands, and no other research projects planned during the  
36 intervention period. The treatment centre provides rehabilitation care covered by health insurance in  
37 association with a university medical centre. Professional study participants are local stakeholders of  
38 serious gaming, including experts, implementers, and providers.  
39  
40  
41

## 1 Patients

2 Patient candidates received an indication of eligibility for outpatient multidisciplinary rehabilitation from  
3 a rehabilitation physician, and completed half of their rehabilitation programme at a participating site.  
4 Physician indications of eligibility are followed, which are based on the results of diagnostic surveys,  
5 physical and psychological investigations, and clinical interviewing via teleconference. Accordingly,  
6 patient participant inclusion criteria are: being between 18 and 67 years of age, reporting the presence  
7 of pain for more than 6 months, or fatigue complaints or a musculoskeletal disease for more than 3  
8 months, having no (more) indication for another (cost-) effective medical treatment, and have  
9 concomitant psychosocial problems. Patients are excluded from participation if: psychiatric symptoms  
10 are not adequately controlled, there is significant risk of psychological decompensation through a  
11 rehabilitation treatment, language or communication problems make it impossible to follow  
12 rehabilitation, and/or demonstrable inability to change behaviour (due to personality disorders, third  
13 party liabilities, or otherwise). An information letter, consent form, and verbal explanation are provided  
14 by local care providers. The recruitment process is monitored to ensure that all candidates are invited.

## 16 Interventions

### 17 Multidisciplinary rehabilitation programme

18 The outpatient multidisciplinary rehabilitation programme includes common bio-psychosocial  
19 approaches, and incorporates a focus on well-being and participation.<sup>26</sup> The standardized 16-week  
20 programme consists of on average 95 hours of individual or group sessions that are organized in  
21 modules and centrally assigned to individual patients based on diagnostic findings. Each patient is  
22 treated by a team of two physiotherapists and two registered master's degree psychologists.  
23 Psychotherapeutic techniques include Cognitive Behavioural Therapy and psychodynamic approaches.  
24 For all patients, treatment contains rationales, goal setting and feedback, social support, exposure  
25 treatment, behavioural repetition and substitution, skills training (in relaxation, social skills, and  
26 meditation), and identity development techniques. Allocation of physical therapy, cognitive  
27 restructuring, eye movement desensitization, and an intensive 2-day well-being course depend on  
28 diagnostic findings for physical status, psychopathological symptoms<sup>55</sup> and fear avoidance beliefs,<sup>56</sup>  
29 post-traumatic stress, and psychological well-being.

### 31 Serious gaming

#### 32 *Theory and change techniques of the serious game LAKA*

33 Developer assumptions for the game LAKA have been documented throughout development and  
34 related to conceptual frameworks (see appendix).<sup>57</sup> Serious gaming is proposed to promote practice for  
35 well-being improvement, and for identifying and diminishing distortions and biases of self. This may be  
36 helpful for patients with CP or FSS in reducing the burden of their symptoms.<sup>58</sup> Based on a review of  
37 information about the design rationale, functionality, validity proof (before outcome evaluation), and  
38 data protection measures of LAKA, an independent jury awarded 3 out of 5 attainable stars for quality  
39 (see appendix).<sup>59</sup>

40 The serious game LAKA promotes practice through an Avatar model. Before the game starts,  
41 participants are invited to identify with an Avatar of their chosen gender and name (table 1). The

1 storyline introduces an Avatar who recently experienced physical and social deterioration, senses an  
 2 urgency to change, and engages in a trip around the world to learn about 'the art of living'. Player tasks  
 3 are: to explore and select virtual action plans for 'encounters' with non-playing characters, to evaluate  
 4 their 'satisfaction' about chosen actions, and to perform skills training in focused attention and open  
 5 monitoring meditation exercises.<sup>60</sup> Encounter scenarios model uncertain events resulting in varying  
 6 Avatar states depending on action plans chosen by players. Encounters are increasingly influenced by  
 7 distant cultural meanings to challenge anticipation of the course of events (i.e. depending on the  
 8 scenario, agreeable responding can result in a pleasant interaction or involvement in a scam). Players  
 9 receive global feedback on the extent to which chosen actions correspond with a reference model for  
 10 values (see appendix). Self-reflective elements are interspersed with short casual action and puzzle  
 11 games, images, and information associated with the location of the Avatar. These features are included  
 12 to vary game play, and can be skipped.

13  
14 *Table 1: Features, dose, and tasks*

| Features                                                       | Dose (in game frequency) | Tasks                                                                                                                                                                                                                                                                                                                                           |
|----------------------------------------------------------------|--------------------------|-------------------------------------------------------------------------------------------------------------------------------------------------------------------------------------------------------------------------------------------------------------------------------------------------------------------------------------------------|
| Introduction                                                   | 1                        | <ul style="list-style-type: none"> <li>- Choose Avatar gender and name</li> <li>- Receive instruction: to identify with the personal Avatar</li> <li>- Introduction to Avatar storyline</li> <li>- Receive task instructions from LAKA (non-playing character with a mentoring role)</li> </ul>                                                 |
| Encounters<br>(See appendix for screenshot and user interface) | 16                       | <ul style="list-style-type: none"> <li>- Select action plans for the Avatar in encounters with non-playing characters (each instance offers 5 optional action plans, which are modelled after a reference set of values: generosity, moral discipline, patience, enthusiastic perseverance).</li> </ul>                                         |
| Mood scenarios                                                 | 8                        | <ul style="list-style-type: none"> <li>- Select action plans for the Avatar when subjected to an adverse event.</li> <li>- Given the adverse scenario: think of what your own affective state would be in this situation, and bear in mind the depicted emotional state of the Avatar.</li> </ul>                                               |
| Reflections                                                    | 4                        | <ul style="list-style-type: none"> <li>- Assess satisfaction about selected Avatar actions on a scale of 0-10.</li> <li>- Receive feedback from LAKA on chosen action plans.</li> <li>- Receive feedback about the correspondence between satisfaction rating and LAKA assessment.</li> </ul>                                                   |
| Attention training:                                            | 3                        | <ul style="list-style-type: none"> <li>- Guided (focused attention and open monitoring) meditation exercises for mental stability.</li> </ul>                                                                                                                                                                                                   |
| Tours:                                                         | 16                       | <ul style="list-style-type: none"> <li>- Skip or listen to 'tour-guide' voiceovers informing about pictures of the location visited by the Avatar.</li> </ul>                                                                                                                                                                                   |
| Loading screens                                                | -                        | <ul style="list-style-type: none"> <li>- See where travel destinations are located on a geographical map.</li> </ul>                                                                                                                                                                                                                            |
| Mini-games:                                                    | 8                        | <ul style="list-style-type: none"> <li>- Action games: Steering a vehicle (by using tilt mechanism of tablet pc, or keyboard arrow controls) to arrive at the next encounter (reference: 'rocket bird').</li> <li>- Puzzle: Fix a road by connecting parts of the road to arrive at the next encounter (reference: 'plumber games').</li> </ul> |
| Festive closing                                                | 1                        | <ul style="list-style-type: none"> <li>- Replay of 'extreme' responses throughout the game.</li> </ul>                                                                                                                                                                                                                                          |

15  
16 *Mode of delivery*

17 In accordance with patient suggestions for optimal reach, the rehabilitation clinic delivers professional  
 18 assistance and the occasion for playing the serious game LAKA on site, besides downloading and playing  
 19 on a home computer<sup>4</sup>. Suitable rooms with Wi-Fi connection, tablet computers with LAKA installed, and

1 headphones are provided. Four 1-hour sessions of serious gaming are planned for 1 to 6 patients  
2 simultaneously during weeks 9-12 of their rehabilitation programme. The sessions are scheduled in  
3 connection with other therapy sessions to ease coordination with daily activities. Staff members are  
4 available for consultation on accessing serious gaming (i.e. for technical issues and adaptation to special  
5 needs). Experienced therapists (1 physiotherapist, and 3 psychologists) facilitate the first session  
6 (introduce LAKA and instruct to complete the game independently during session 2 and 3) and the  
7 fourth session (debriefing). The goal of the debriefings was to discuss experiences of game play,  
8 technology acceptance and learning, and facilitate learning transfer to daily life. For external validity, no  
9 specific roles were assigned to other local stakeholders for the delivery of serious gaming (i.e. to observe  
10 'natural' problem solving by implementers).

## 11 Programme theory

12 The framework of context, mechanism, outcome (CMO) configurations is used to structure ongoing  
13 development of a programme theory for serious gaming as a complement during multidisciplinary  
14 rehabilitation.<sup>61</sup> To illustrate, a patient with an active coping style self-exposed for a short amount of  
15 time to unsupported serious gaming during multidisciplinary rehabilitation (context), experienced  
16 enjoyment and discrepancy regarding valued self-identities (mechanism), and expected this to  
17 contribute to health improvement (outcome)<sup>4</sup>. Timely building blocks for CMO configurations for serious  
18 gaming are deduced from the literature. Besides by symptom categorization, serious gaming outcomes  
19 were interpreted by frameworks of rehabilitation mechanisms as self-improvements (see appendix).<sup>27 45</sup>  
20 <sup>57 58 62 63</sup> Two comprehensive implementation models are used for the classification of context factors,  
21 such as planning and compatibility relative to other treatment components.<sup>64 65</sup> Finally, mechanisms of  
22 serious gaming are discerned as gaming behaviours (frequency, length, and performance of game play),  
23 and user experiences of gaming, simulation, and information systems. More specifically, subjective  
24 mechanisms may involve sense of presence,<sup>66</sup> technology acceptance,<sup>67</sup> positive and negative affect,<sup>68</sup>  
25 game-based learning,<sup>69</sup> and perceived 'learning transfer' to daily life.<sup>53</sup>

## 26 Measures

### 27 Quantitative data

28 Outcome and case-mix variables are retrieved from routinely administered clinical patient records after  
29 all participants have completed their rehabilitation programme. All patient variables are collected by the  
30 clinic through a standardized and secured web-surveying procedure, including facilitation of patients  
31 without convenient computer access and promotion of follow-up completion.<sup>4 70</sup> Outcomes are  
32 monitored at the indication of eligibility (at baseline), after 8 weeks of treatment (intermediate), and  
33 again after 16 weeks of treatment (post). Relevant and valid measures were available for assessing the  
34 primary outcomes (see table 2). These endpoints include a numerical rating scale for current pain  
35 intensity,<sup>71</sup> the pain coping and cognitions list (PCCL),<sup>72</sup> fatigue as assessed by the Checklist Individual  
36 Strength (CIS),<sup>63</sup> and psychopathological symptoms as measured by the Symptom Checklist (SCL-90).<sup>55</sup>  
37 Secondary measures focus on clinical relevance, such as patients' global impression of improvement  
38 after treatment.<sup>45</sup> Another widely used single item Likert-scale rating is used for measuring general

1 health (poor to excellent).<sup>73</sup> Finally, numerical rating scale items are available to assess patients'  
2 satisfaction about treatment and functioning (see table 2).

3  
4 *Table 2: Quantitative outcome measures*

| Variables                       | Measures                                                                                                     | Time of measurement                    |
|---------------------------------|--------------------------------------------------------------------------------------------------------------|----------------------------------------|
| <b>Primary outcomes</b>         |                                                                                                              |                                        |
| Current pain intensity          | 1 item Numerical Rating Scale (NRS) 0-10                                                                     | Baseline, intermediate, post treatment |
| Pain coping and cognition       | Pain Coping and Cognitions List (PCCL)                                                                       | "                                      |
| Fatigue                         | Checklist Individual Strength (CIS)                                                                          | "                                      |
| Psychopathological symptoms     | Symptom Check List (SCL-90)                                                                                  | "                                      |
| <b>Secondary outcomes</b>       |                                                                                                              |                                        |
| Clinically relevant improvement | Patient Global Impression of Change (PGIC)                                                                   | Intermediate, post treatment           |
| General subjective health       | "What do you think of your current health in general?"                                                       | "                                      |
| Perceived functioning           | "Please indicate how satisfied you are generally taken with your current level of functioning"               | "                                      |
| Treatment satisfaction          | Three Likert scale items, i.e. "Would you recommend this treatment centre to other rehabilitation patients?" | Post treatment                         |

5  
6 Patient variables are demographic, health status, and treatment history information (see table 3).

7  
8 *Table 3: Patient characteristics*

| Variables                    | Variables (measurement)                                                                                                                                                                                  |
|------------------------------|----------------------------------------------------------------------------------------------------------------------------------------------------------------------------------------------------------|
| Age                          | Years of age (calculated from registered date of birth)                                                                                                                                                  |
| Gender                       | % Female                                                                                                                                                                                                 |
| Socio-economic status        | Highest education level, source of income (categorical rating items)                                                                                                                                     |
| Coping style                 | Utrecht Coping List (UCL) <sup>74</sup> (validated questionnaire)                                                                                                                                        |
| Environment                  | Presence of problems with regard to social life, financial situation, trauma, work situation (categorical rating items)                                                                                  |
| Symptoms                     | Duration (months; calculated from the date of onset), course (categorical rating item), and pain location (standard physical examination report)                                                         |
| Physical status              | Body Mass Index, blood pressure, musculoskeletal conditions (standard physical examination report)                                                                                                       |
| Other treatment              | (Changes of) presence of medication usage, frequency of health care visits, previous visits to health providers (medical specialists, physiotherapists, and/or psychologist) (categorical rating items). |
| Treatment (modules) received | Automatic logs of session presence (determined from absence registrations by health care providers)                                                                                                      |

9  
10 Intervention mechanisms may cover subjective experiences and objective behaviours of serious gaming  
11 (see table 4). Automatic registrations in patient files enable objective assessment of serious gaming  
12 frequency, duration, progress, and performance. Moreover, a short survey was composed in  
13 collaboration with the rehabilitation centre to measure subjective experiences shortly after serious  
14 gaming. This survey contains items on perceptions of using a serious game (regarding usefulness, ease of  
15 use, trust, enjoyment, goal clarity, challenge, and learning<sup>4 67 69</sup>), the 10-item short form of the positive  
16 and negative affect scale,<sup>75</sup> the involvement and realism scales from the Igroup Presence  
17 Questionnaire,<sup>66</sup> and (0-10) numerical rating scale item on perceived learning transfer. A reminder was



sent to intervention group participants if the survey was not completed within a week after their last gaming session. Finally, a questionnaire on patient values may be used to explore relationships between mechanisms and outcomes of serious gaming.

Table 4: Quantitative indicators for mechanisms

| Variables                                    | Measures                                                                                                                                                       | Respondents                     | Time of measurement                    |
|----------------------------------------------|----------------------------------------------------------------------------------------------------------------------------------------------------------------|---------------------------------|----------------------------------------|
| Reach, dose, gaming performance              | Data logs: frequency, timing, length, progress, and scores of play                                                                                             | Intervention group              | During serious gaming (automatic)      |
| Acceptability and playability                | Selection of UTAUT2*1 items (perceived usefulness, ease of use, trust, enjoyment)<br>Selection of EGameFlow items (clear goals, challenge, perceived learning) | Intervention group              | Post serious gaming                    |
| Positive and negative affect                 | PANAS-SF*2                                                                                                                                                     | Intervention group              | Post serious gaming                    |
| Presence (general, involvement, and realism) | IGroup Sense of Presence Questionnaire item for general sense of presence, and subscales for involvement and realism.                                          | Intervention group              | Post serious gaming                    |
| Learning transfer                            | Numerical rating scale (0-10): "Use the following slider to indicate to what extent you expect that the LAKA sessions contribute to your daily life"           | Intervention group              | Post serious gaming                    |
| Values (expressed in thoughts and behaviour) | Values questionnaire*3: 5-point Likert scales, i.e. "If I find it necessary, I'll intervene to help or to protect others".                                     | Intervention and control groups | Baseline, intermediate, post treatment |

\*1 Unified theory of acceptance and use of technology

\*2 Positive and negative affect scale – short form

\*3 Psychometric properties are still under investigation. Empirical support for good scale internal consistency, and strong associations with psychological well-being in rehabilitating patients were documented in a report for the Dutch Committee on Test Affairs (COTAN).

## Qualitative data

Protocols for focus group and semi-structured patient interviews are informed by the CMO building blocks and principles for interviewing in realist evaluation.<sup>76</sup> Accordingly, the interviewer starts with an open and explorative style, but may sometimes take an explanatory role to raise discussion about programme theory elements when CMO configurations become better delineated. Providers are expected to be especially knowledgeable about context and mechanisms of serious gaming, while patients may say the most about context and outcomes. Purposive sampling of participants is used until reaching a point of data saturation. All interviews are tape-recorded and verbatim transcribed. Transcripts and a summary of findings are sent to participants by e-mail to enable them to check if their views are accurately reflected.

### Stakeholder (focus group) interviewing

Four focus group interviews are held, two before and two after the naturalistic experiment, to involve stakeholders in the ongoing development of serious gaming and programme theory. Participant selection and topics are based on actual data needs. Heterogeneous groups of care providers, implementers, and experts (in ICT, well-being, and serious gaming) are invited for the first and last discussion meetings. The first interview focused on the research goals for an open discussion. The last group interview will focus on programme theory for member checking and refinement. Homogenous



1  
2  
3 1 groups of provider participants may be invited for the second and third focus groups for more in-depth  
4 2 information. Provider participants are asked to share positive and/or negative feedback about serious  
5 3 gaming via a secured web-form. This includes information on the occurrence and management of  
6 4 adverse events and/or unintended effects during serious gaming.  
7  
8  
9

#### 10 6 *Patient interviewing*

11 7 Two open interview questions about gaming experience and perceived learning transfer are added to  
12 8 the post-gaming survey for intervention group participants. Patient participants with high and low  
13 9 scores on a 1-item numerical rating scale (0-10) for perceived learning transfer are invited for a semi-  
14 10 structured interview after their rehabilitation treatment. These interviewees are asked to describe their  
15 11 health outcomes during rehabilitation, and to list the three most important reasons why serious gaming  
16 12 did, or did not, contribute positively or negatively to this process. A point of saturation is reached if the  
17 13 three factors (context and/or mechanisms) mentioned are all richly described. Control group  
18 14 interviewees are matched to some of the intervention group interviewees to compare rehabilitation  
19 15 outcome changes for similar cases with versus without serious gaming.  
20  
21  
22  
23  
24

#### 25 17 **Analysis**

##### 26 18 Statistical outcome evaluation

27 19 Quantitative data will be imported in SPSS 22, described after statistical inferences, and analysed on  
28 20 intention-to-treat basis. All case-mix variables are described for individual study participants, as well as  
29 21 the differences between intervention group and control group participants. Multivariate mixed-linear  
30 22 modelling techniques will be used to evaluate the extent to which serious gaming predicts variance in  
31 23 patient outcome levels between the intermediate and final outcome assessments of the rehabilitation  
32 24 programme. Effective sample size and intra-class coefficients will be calculated to determine  
33 25 dependency on hierarchical patterns in outcome variation by care provider levels. An optimal prediction  
34 26 model will be specified, correcting for potential unbalances between the study groups (at baseline  
35 27 and/or intermediate), and/or important higher-level random effects.  
36  
37  
38  
39

##### 40 29 Process analyses

41 30 A programme theory will be created after a sequence of analysis steps. In each step, analyses will be  
42 31 performed completely by MV and in part by MJ or AZ (independent coding of interviews, and re-running  
43 32 syntax), and discussions will be held involving a third author (HV) to resolve differences and find  
44 33 agreement about the results. First, concurrently collected qualitative data analyses will be performed to  
45 34 identify plausible CMO configurations from the perspectives stakeholders. All qualitative data will be  
46 35 coded in vivo and higher order coded using CMO building blocks to determine configurations. Secondly,  
47 36 a selection of key CMO configurations will be made based on counts of the number of participants  
48 37 supporting them in their open text responses to the post-gaming survey. Hypotheses will contain  
49 38 specific expectations of (linear) relationships implied by the CMOs. If needed, additional provider or site  
50 39 level data (i.e. debriefing session group sizes) will be retrieved from clinical administration records.  
51 40 Third, quantitative data will be screened by testing internal consistency in SPSS or data triangulation  
52 41 with qualitative data if possible. Fourth, hypotheses will be tested with available and valid quantitative  
53  
54  
55  
56  
57  
58  
59  
60

1  
2  
3 1 data. Fifth, data from the last focus group will be coded. Sixth, quantitative and qualitative findings will  
4 2 be mixed for an overall interpretation and drawing final conclusions.  
5  
6 3

#### 4 **Power calculation**

5 From practical, theoretical and statistical perspectives, a powerful primary outcome assessment was  
6 anticipated by focusing on recruiting a sufficient number of individual patients from the four  
7 participating treatment facilities. The rehabilitation centre (n=1), intervention sites (n=2), as well as the  
8 number of time-points (3), are practically fixed. Analysis of unpublished pilot data suggested that  
9 variation in baseline to post treatment outcome changes between treatment locations might be  
10 negligible relative to individual variation within sites (intra-class correlations < .05).

11 G\*Power was used for sample-size calculations<sup>77</sup>. A required sample size of 212 participants was  
12 calculated for determining a small to medium effect by means of a MANOVA test of global effects. Effect  
13 size estimation was based on meta-analysis results for the effects of serious games on cognition,  
14 motivation, and psychological outcomes<sup>3</sup>. The following parameters were inserted: for power (1-Beta) =  
15 0.8; effect-size  $f^2(V) = .0625$ ; type-II error probability (alpha) = .05; number of dependent variables = 5;  
16 and number of groups = 2. By the same standards, it was checked if the determined sample size would  
17 also be sufficient for independent univariate tests of variance on each of the primary outcomes.

18 Anticipating some level dependence and/or randomly missing data (pain coping and cognition  
19 measures are not filled out by patients reporting 0 pain intensity at baseline), 250 patient participants  
20 will be recruited. Assuming 20% treatment and study attrition rates and an average weekly inflow of 9  
21 patients starting with their treatment within each of the four facilities, outcome data are available 6  
22 months after recruiting the first patient.  
23

#### 24 **ETHICS AND DISSEMINATION**

25 Ethical approval for the mixed-methods protocol was obtained from the psychological ethics committee  
26 of Tilburg School of Social and Behavioural Sciences (EC-2016.25t). In the absence of a legal obligation  
27 for medical ethics review, independent judgement was provided on the protection of patient rights by  
28 conformity to the letter and rationale of the applicable laws and research practice. Patient participants  
29 are consented before participation, that is before receiving the additional (5-10 minute) survey  
30 (intervention group), being invited for a semi-structured interview, or retrieving their codified data.  
31 Participants were protected against harm by regular clinical safety measures throughout. Professional  
32 participants are also consented before participation in qualitative data collections. Under supervision of  
33 MJ, MV is responsible for safe storage and the accessibility of (codified) research data to all authors.  
34 Qualitative and quantitative results will be presented and discussed together in one or more research  
35 article(s), and at one or more international scientific conferences. A summary of study results will be  
36 provided to the study participants.  
37

#### 38 **DISCUSSION**

39 The novelty of the serious gaming intervention and study methods are strengths of the proposed  
40 evaluation, but imply limitations as well. LAKA is the first serious game that promotes practice for self-  
41 process enhancement under highly prevalent adverse conditions such as CP or FSS. CMO configurations

1  
2  
3 1 may be identified that are transferable to other populations and settings where similar approaches to  
4 2 behavioural change are beneficial<sup>78</sup>. However, internal and external validity are threatened due to  
5 3 divergence from the golden standard procedures of a (cluster) randomized controlled (multi-centre)  
6 4 trial. Instead, pragmatic considerations for the deployment of serious gaming during rehabilitation in  
7 5 two sites of a single Dutch centre led treatment allocation, recruitment, and data collection methods.  
8 6 Different comparisons with serious gaming (i.e. usual care, waiting list, or text based computer-based  
9 7 intervention), more elaborate diagnostic assessment, and outcome measurements including role  
10 8 participation and long-term follow-up are precluded. Still, conditional optimization of quasi-  
11 9 experimental methods is a legitimate strategy for obtaining evidence on the effectiveness of an  
12 10 intervention.<sup>79</sup> Apparent confounding factors (i.e. differences in usual treatment received) should be  
13 11 controlled for by appropriate methods. By the emergence of practical limitations, study strengths shift  
14 12 towards dealing with questions of process. The realist evaluation principles and mixed-methods used in  
15 13 this study are increasingly accepted in scientific communities as means to compensate for practical  
16 14 limitations and to build programme theories that enhance future predictions of intervention effects  
17 15 across patients and health care settings.

18 16 Legitimate application of mixed-methods is promoted by the protocol in various ways. First,  
19 17 participant recruitment and selection methods for quantitative and qualitative examinations allow a  
20 18 strong representation of patients receiving bio-psychosocial treatment in a regular outpatient setting.  
21 19 This differs from studies in which the eligibility of applicants for computer-based intervention depends  
22 20 on motivation and/or ability to use a computer or internet facilities.<sup>80 81</sup> Secondly, perspectives of  
23 21 insiders (patients, health care providers and developers) and outsiders (independent experts and  
24 22 members of the research team) will be utilized. Third, relevant theoretical constructs are specified  
25 23 before quantitative and qualitative data collections to prevent process analysis results being strongly  
26 24 affected by the sequencing of qualitative and quantitative methods. Fourth, predefined steps structure  
27 25 data convergence and switches in epistemological paradigms when qualitative methods are used to  
28 26 propose quantitative results (in advance) and to explain them (afterwards).

## 27 28 **ACKNOWLEDGEMENTS**

29 Acknowledged for their role in the development of serious gaming are: Ciran (owner & developer):  
30 Alfonsus van Bergen, Jan Jochijms, and Jeroen van Bergen; software developers: Paladin Studios, Marcel  
31 Lips; contributors of intellectual content: Tibetan institute Yeunten Ling, Karel Michiels, and Jac Geurts.

## 32 33 **AUTHORS' CONTRIBUTIONS**

34 MV, HV, AM, and MJ conceived the protocol. MV drafted the work, which was critically revisited by HV,  
35 AZ, AM and MJ for important intellectual content. All authors have given their final approval of the  
36 version to be published and agree to be accountable for all aspects of the work.

## 37 38 **FUNDING STATEMENT**

39 The work was supported by Ciran in the development of LAKA, allocation of serious gaming, and  
40 provision of raw quantitative data. Ciran is a foundation that develops and provides a rehabilitation care  
41 programme for complex chronic pain and fatigue symptoms in association with Radboud academic

1  
2  
3 1 medical centre (The Netherlands). Qualitative data collection, data management, data analyses,  
4 2 interpretation of results, writing of the report, and publication decisions are authorized by university  
5 3 staff members.  
6 4

#### 5 **COMPETING INTERESTS STATEMENT**

6 All authors have completed the ICMJE uniform disclosure form and declare:

7 Dr. Vugts reports employment by Ciran, and is provided time and occasion to conduct independent  
8 doctoral research by way of agreement at Tranzo, Scientific Centre for Care and Welfare, Tilburg  
9 University. The terms of this arrangement have been reviewed and approved by Tranzo in accordance  
10 with its policy on objectivity in research.

11 Dr. Joosen has nothing to disclose.

12 Dr. Zedlitz has nothing to disclose.

13 Dr. Vrijhoef reports personal fees from Ciran, outside the submitted work.

14 Dr. Mert has nothing to disclose.  
15

#### 16 **REFERENCES**

- 17 1. Gentile DA, Anderson CA, Yukawa S, et al. The effects of prosocial video games on prosocial behaviors:  
18 International evidence from correlational, longitudinal, and experimental studies. *Personality  
19 and Social Psychology Bulletin* 2009.
- 20 2. Primack BA, Carroll MV, McNamara M, et al. Role of video games in improving health-related  
21 outcomes: a systematic review. *American journal of preventive medicine* 2012;**42**(6):630-38.
- 22 3. DeSmet A, Van Ryckeghem D, Compennolle S, et al. A meta-analysis of serious digital games for  
23 healthy lifestyle promotion. *Preventive medicine* 2014;**69**:95-107.
- 24 4. Vugts MA, Joosen MC, van Bergen AH, et al. Feasibility of Applied Gaming During Interdisciplinary  
25 Rehabilitation for Patients With Complex Chronic Pain and Fatigue Complaints: A Mixed-  
26 Methods Study. *JMIR serious games* 2016;**4**(1).
- 27 5. Breivik H, Collett B, Ventafridda V, et al. Survey of chronic pain in Europe: prevalence, impact on daily  
28 life, and treatment. *European journal of pain* 2006;**10**(4):287-87.
- 29 6. Kennedy J, Roll JM, Schraudner T, et al. Prevalence of persistent pain in the US adult population: new  
30 data from the 2010 national health interview survey. *The Journal of Pain* 2014;**15**(10):979-84.
- 31 7. Fayaz A, Croft P, Langford R, et al. Prevalence of chronic pain in the UK: a systematic review and meta-  
32 analysis of population studies. *Bmj Open* 2016;**6**(6):e010364.
- 33 8. Nakamura M, Nishiwaki Y, Ushida T, et al. Prevalence and characteristics of chronic musculoskeletal  
34 pain in Japan: a second survey of people with or without chronic pain. *Journal of Orthopaedic  
35 Science* 2014;**19**(2):339-50.
- 36 9. Häuser W, Wolfe F, Henningsen P, et al. Untying chronic pain: prevalence and societal burden of  
37 chronic pain stages in the general population—a cross-sectional survey. *BMC Public Health*  
38 2014;**14**(1):1.
- 39 10. Gatchel RJ, Peng YB, Peters ML, et al. The biopsychosocial approach to chronic pain: scientific  
40 advances and future directions. *Psychological bulletin* 2007;**133**(4):581.
- 41 11. Wessely SHS. How should functional somatic syndromes be diagnosed? *Int J Behav Med*  
42 2013;**20**:239-41.
- 43 12. Meeus M, Nijs J. Central sensitization: a biopsychosocial explanation for chronic widespread pain in  
44 patients with fibromyalgia and chronic fatigue syndrome. *Clinical rheumatology* 2007;**26**(4):465-  
45 73.

13. Woolf CJ. Central sensitization: implications for the diagnosis and treatment of pain. *Pain* 2011;**152**(3):S2-S15.
14. Burri A, Ogata S, Vehof J, et al. Chronic widespread pain: clinical comorbidities and psychological correlates. *Pain* 2015;**156**(8):1458-64.
15. Burri A, Ogata S, Livshits G, et al. The Association between Chronic Widespread Musculoskeletal Pain, Depression and Fatigue Is Genetically Mediated. *Plos One* 2015;**10**(11):e0140289.
16. MacDonald G, Leary MR. Why does social exclusion hurt? The relationship between social and physical pain. *Psychological bulletin* 2005;**131**(2):202.
17. Henningsen P, Zipfel S, Herzog W. Management of functional somatic syndromes. *The Lancet* 2007;**369**(9565):946-55.
18. Afari N, Ahumada SM, Wright LJ, et al. Psychological trauma and functional somatic syndromes: a systematic review and meta-analysis. *Psychosomatic medicine* 2014;**76**(1):2.
19. Vlaeyen JW, Linton SJ. Fear-avoidance and its consequences in chronic musculoskeletal pain: a state of the art. *Pain* 2000;**85**(3):317-32.
20. Vercoulen J, Swanink C, Galama J, et al. The persistence of fatigue in chronic fatigue syndrome and multiple sclerosis: development of a model. *Journal of psychosomatic research* 1998;**45**(6):507-17.
21. McCracken LM, Morley S. The psychological flexibility model: A basis for integration and progress in psychological approaches to chronic pain management. *The Journal of Pain* 2014;**15**(3):221-34.
22. Halliday N, Treanor C, Galvin R, et al. Effectiveness of Multidisciplinary Pain Rehabilitation Programs for Patients with Fibromyalgia Syndrome: A Systematic Review. *Arthritis & Rheumatology* 2015;**67**:1423-24.
23. Kamper SJ, Apeldoorn AT, Chiarotto A, et al. Multidisciplinary biopsychosocial rehabilitation for chronic low back pain. *The Cochrane Library* 2014.
24. Vos-Vromans D, Smeets R, Huijnen I, et al. Multidisciplinary rehabilitation treatment versus cognitive behavioural therapy for patients with chronic fatigue syndrome: a randomized controlled trial. *Journal of internal medicine* 2016;**279**(3):268-82.
25. Scascighini L, Toma V, Dober-Spielmann S, et al. Multidisciplinary treatment for chronic pain: a systematic review of interventions and outcomes. *Rheumatology* 2008;**47**(5):670-78.
26. Garschagen A, Steegers MA, Bergen AH, et al. Is there a need for including spiritual care in interdisciplinary rehabilitation of chronic pain patients? Investigating an innovative strategy. *Pain Practice* 2015;**15**(7):671-87.
27. Veehof MM, Trompetter HR, Bohlmeijer ET, et al. Acceptance- and mindfulness-based interventions for the treatment of chronic pain: A meta-analytic review. *Cognitive Behaviour Therapy* 2016;**45**(1):5-31.
28. Andersson G. Internet-delivered psychological treatments. *Annual review of clinical psychology* 2016;**12**:157-79.
29. Wentzel J, van der Vaart R, Bohlmeijer ET, et al. Mixing online and face-to-face therapy: How to benefit from blended care in mental health care. *JMIR mental health* 2016;**3**(1).
30. Ehde DM, Dillworth TM, Turner JA. Cognitive-behavioral therapy for individuals with chronic pain: Efficacy, innovations, and directions for research. *American Psychologist* 2014;**69**(2):153-66.
31. Peng W, Lin J-H, Crouse J. Is playing exergames really exercising? A meta-analysis of energy expenditure in active video games. *Cyberpsychology, Behavior, and Social Networking* 2011;**14**(11):681-88.
32. Lumsden J, Edwards EA, Lawrence NS, et al. Gamification of cognitive assessment and cognitive training: a systematic review of applications and efficacy. *JMIR Serious Games* 2016;**4**(2):e11.



- 1  
2  
3  
4  
5  
6  
7  
8  
9  
10  
11  
12  
13  
14  
15  
16  
17  
18  
19  
20  
21  
22  
23  
24  
25  
26  
27  
28  
29  
30  
31  
32  
33  
34  
35  
36  
37  
38  
39  
40  
41  
42  
43  
44  
45  
46  
47  
48  
49  
50  
51  
52  
53  
54  
55  
56  
57  
58  
59  
60
- 1 33. Turner WA, Casey LM. Outcomes associated with virtual reality in psychological interventions: where  
2 are we now? *Clinical psychology review* 2014;**34**(8):634-44.
  - 3 34. Malloy KM, Milling LS. The effectiveness of virtual reality distraction for pain reduction: a systematic  
4 review. *Clinical psychology review* 2010;**30**(8):1011-18.
  - 5 35. Laver K, George S, Thomas S, et al. Virtual reality for stroke rehabilitation: an abridged version of a  
6 Cochrane review. *European journal of physical and rehabilitation medicine* 2015;**51**(4):497-506.
  - 7 36. Horne-Moyer HL, Moyer BH, Messer DC, et al. The use of electronic games in therapy: a review with  
8 clinical implications. *Current psychiatry reports* 2014;**16**(12):1-9.
  - 9 37. Kharrazi H, Lu AS, Gharghabi F, et al. A scoping review of health game research: Past, present, and  
10 future. *Games for health: Research, Development, and Clinical Applications* 2012;**1**(2):153-64.
  - 11 38. DasMahapatra P, Chiauzzi E, Pujol LM, et al. Mediators and moderators of chronic pain outcomes in  
12 an online self-management program. *The Clinical journal of pain* 2015;**31**(5):404-13.
  - 13 39. Trompetter HR, Bohlmeijer ET, Fox J-P, et al. Psychological flexibility and catastrophizing as  
14 associated change mechanisms during online Acceptance & Commitment Therapy for chronic  
15 pain. *Behaviour Research and Therapy* 2015;**74**:50-59.
  - 16 40. Baranowski T, Buday R, Thompson DI, et al. Playing for real: video games and stories for health-  
17 related behavior change. *American journal of preventive medicine* 2008;**34**(1):74-82. e10.
  - 18 41. Ryan RM, Rigby CS, Przybylski A. The motivational pull of video games: A self-determination theory  
19 approach. *Motivation and emotion* 2006;**30**(4):344-60.
  - 20 42. Connolly TM, Boyle EA, MacArthur E, et al. A systematic literature review of empirical evidence on  
21 computer games and serious games. *Computers & Education* 2012;**59**(2):661-86.
  - 22 43. Kim B, Park H, Baek Y. Not just fun, but serious strategies: Using meta-cognitive strategies in game-  
23 based learning. *Computers & Education* 2009;**52**(4):800-10.
  - 24 44. Craig P, Dieppe P, Macintyre S, et al. Developing and evaluating complex interventions: the new  
25 Medical Research Council guidance. *BMJ (Clinical research ed)* 2008;**337**:a1655.
  - 26 45. Dworkin RH, Turk DC, Wyrwich KW, et al. Interpreting the clinical importance of treatment outcomes  
27 in chronic pain clinical trials: IMMPACT recommendations. *The Journal of Pain* 2008;**9**(2):105-21.
  - 28 46. Chaudoir SR, Dugan AG, Barr CH. Measuring factors affecting implementation of health innovations:  
29 a systematic review of structural, organizational, provider, patient, and innovation level  
30 measures. *Implementation Science* 2013;**8**(1):1.
  - 31 47. Webb T, Joseph J, Yardley L, et al. Using the internet to promote health behavior change: a  
32 systematic review and meta-analysis of the impact of theoretical basis, use of behavior change  
33 techniques, and mode of delivery on efficacy. *Journal of medical Internet research*  
34 2010;**12**(1):e4.
  - 35 48. Elbert NJ, van Os-Medendorp H, van Renselaar W, et al. Effectiveness and cost-effectiveness of  
36 ehealth interventions in somatic diseases: a systematic review of systematic reviews and meta-  
37 analyses. *Journal of medical Internet research* 2014;**16**(4):e110.
  - 38 49. Berwick DM. The science of improvement. *Jama* 2008;**299**(10):1182-84.
  - 39 50. Weise C, Kleinstaubler M, Andersson G. Internet-Delivered Cognitive-Behavior Therapy for Tinnitus: A  
40 Randomized Controlled Trial. *Psychosomatic Medicine* 2016;**78**(4):501-10.
  - 41 51. Wouters P, Van Oostendorp H. A meta-analytic review of the role of instructional support in game-  
42 based learning. *Computers & Education* 2013;**60**(1):412-25.
  - 43 52. Wouters P, Van Nimwegen C, Van Oostendorp H, et al. A meta-analysis of the cognitive and  
44 motivational effects of serious games: American Psychological Association, 2013.
  - 45 53. Crookall D. Serious games, debriefing, and simulation/gaming as a discipline. *Simulation & gaming*  
46 2010;**41**(6):898-920.
  - 47 54. Creswell JW, Clark VLP. *Designing and conducting mixed methods research*. 2007.

- 1  
2  
3 1 55. Arrindell WA, Ettema J. *SCL-90: Handleiding bij een multidimensionele psychopathologie-indicator*:  
4 2 Swets test publishers, 1986.  
5 3  
6 4 56. Swinkels-Meewisse E, Swinkels R, Verbeek A, et al. Psychometric properties of the Tampa Scale for  
7 4 kinesiophobia and the fear-avoidance beliefs questionnaire in acute low back pain. *Manual*  
8 5 *therapy* 2003;**8**(1):29-36.  
9 6 57. Vago DR, David SA. Self-awareness, self-regulation, and self-transcendence (S-ART): a framework for  
10 7 understanding the neurobiological mechanisms of mindfulness. *Frontiers in human*  
11 8 *neuroscience* 2012;**6**:296.  
12 9  
13 10 58. Morley S. The self in pain. *Reviews in pain* 2010;**4**(1):24-27.  
14 11 59. Graafland M, Dankbaar M, Mert A, et al. How to systematically assess serious games applied to  
15 12 health care. *JMIR serious games* 2014;**2**(2):e11.  
16 13 60. Lutz A, Slagter HA, Dunne JD, et al. Attention regulation and monitoring in meditation. *Trends in*  
17 14 *cognitive sciences* 2008;**12**(4):163-69.  
18 15 61. Pawson R, Tilley N. *Realistic evaluation*: Sage, 1997.  
19 16 62. Zijlema WL, Stolk RP, Löwe B, et al. How to assess common somatic symptoms in large-scale studies:  
20 17 a systematic review of questionnaires. *Journal of psychosomatic research* 2013;**74**(6):459-68.  
21 18 63. Dittner AJ, Wessely SC, Brown RG. The assessment of fatigue: a practical guide for clinicians and  
22 19 researchers. *Journal of psychosomatic research* 2004;**56**(2):157-70.  
23 20 64. Damschroder LJ, Aron DC, Keith RE, et al. Fostering implementation of health services research  
24 21 findings into practice: a consolidated framework for advancing implementation science.  
25 22 *Implementation science* 2009;**4**(1):1.  
26 23 65. Grol R, Wensing M. What drives change? Barriers to and incentives for achieving evidence-based  
27 24 practice. *Medical Journal of Australia* 2004;**180**(6):S57.  
28 25 66. Lessiter J, Freeman J, Keogh E, et al. A cross-media presence questionnaire: The ITC-Sense of  
29 26 Presence Inventory. *Presence: Teleoperators and virtual environments* 2001;**10**(3):282-97.  
30 27 67. Venkatesh V, Thong JY, Xu X. Consumer acceptance and use of information technology: extending  
31 28 the unified theory of acceptance and use of technology. *MIS quarterly* 2012;**36**(1):157-78.  
32 29 68. Watson D, Clark LA, Tellegen A. Development and validation of brief measures of positive and  
33 30 negative affect: the PANAS scales. *Journal of personality and social psychology* 1988;**54**(6):1063.  
34 31 69. Fu F-L, Su R-C, Yu S-C. EGameFlow: A scale to measure learners' enjoyment of e-learning games.  
35 32 *Computers & Education* 2009;**52**(1):101-12.  
36 33 70. Eysenbach G. Improving the quality of Web surveys: the Checklist for Reporting Results of Internet E-  
37 34 Surveys (CHERRIES). *Journal of medical Internet research* 2004;**6**(3):e34.  
38 35 71. Price DD, Bush FM, Long S, et al. A comparison of pain measurement characteristics of mechanical  
39 36 visual analogue and simple numerical rating scales. *Pain* 1994;**56**(2):217-26.  
40 37 72. Spinhoven P, Kuile M, Kole-Snijders AM, et al. Catastrophizing and internal pain control as mediators  
41 38 of outcome in the multidisciplinary treatment of chronic low back pain. *European Journal of Pain*  
42 39 2004;**8**(3):211-19.  
43 40 73. Ware Jr JE, Sherbourne CD. The MOS 36-item short-form health survey (SF-36): I. Conceptual  
44 41 framework and item selection. *Medical care* 1992:473-83.  
45 42 74. Schreurs PJG, Van de Willige G, Brosschot JF, et al. *De Utrechtse Coping lijst: Omgaan met problemen*  
46 43 *en gebeurtenissen*: Pearson, 1993.  
47 44 75. Thompson ER. Development and validation of an internationally reliable short-form of the positive  
48 45 and negative affect schedule (PANAS). *Journal of cross-cultural psychology* 2007;**38**(2):227-42.  
49 46 76. Manzano A. The craft of interviewing in realist evaluation. *Evaluation* 2016:1356389016638615.  
50 47 77. Faul F, Erdfelder E, Lang A-G, et al. G\* Power 3: A flexible statistical power analysis program for the  
51 48 social, behavioral, and biomedical sciences. *Behavior research methods* 2007;**39**(2):175-91.  
52  
53  
54  
55  
56  
57  
58  
59  
60



- 1  
2  
3  
4  
5  
6  
7  
8  
9  
10  
11  
12  
13  
14  
15  
16  
17  
18  
19  
20  
21  
22  
23  
24  
25  
26  
27  
28  
29  
30  
31  
32  
33  
34  
35  
36  
37  
38  
39  
40  
41  
42  
43  
44  
45  
46  
47  
48  
49  
50  
51  
52  
53  
54  
55  
56  
57  
58  
59  
60
- 1 78. Spijkerman M, Pots W, Bohlmeijer E. Effectiveness of online mindfulness-based interventions in  
2 improving mental health: A review and meta-analysis of randomised controlled trials. *Clinical*  
3 *psychology review* 2016;**45**:102-14.  
4 79. Senn B, Kirsch M, Sanz C, et al. Developing and evaluating complex interventions: the new Medical  
5 Research Council guidance. *Studies* 2013;**59**:587-92.  
6 80. Chiauzzi E, Pujol LA, Wood M, et al. painACTION-Back Pain: A self-management website for people  
7 with chronic back pain. *Pain Medicine* 2010;**11**(7):1044-58.  
8 81. Trompetter HR, Bohlmeijer ET, Veehof MM, et al. Internet-based guided self-help intervention for  
9 chronic pain based on Acceptance and Commitment Therapy: A randomized controlled trial.  
10 *Journal of Behavioral Medicine* 2015;**38**(1):66-80.  
11

1  
2  
3  
4  
5  
6  
7  
8  
9  
10  
11  
12  
13  
14  
15  
16  
17  
18  
19  
20  
21  
22  
23  
24  
25  
26  
27  
28  
29  
30  
31  
32  
33  
34  
35  
36  
37  
38  
39  
40  
41  
42  
43  
44  
45  
46  
47  
48  
49  
50  
51  
52  
53  
54  
55  
56  
57  
58  
59  
60

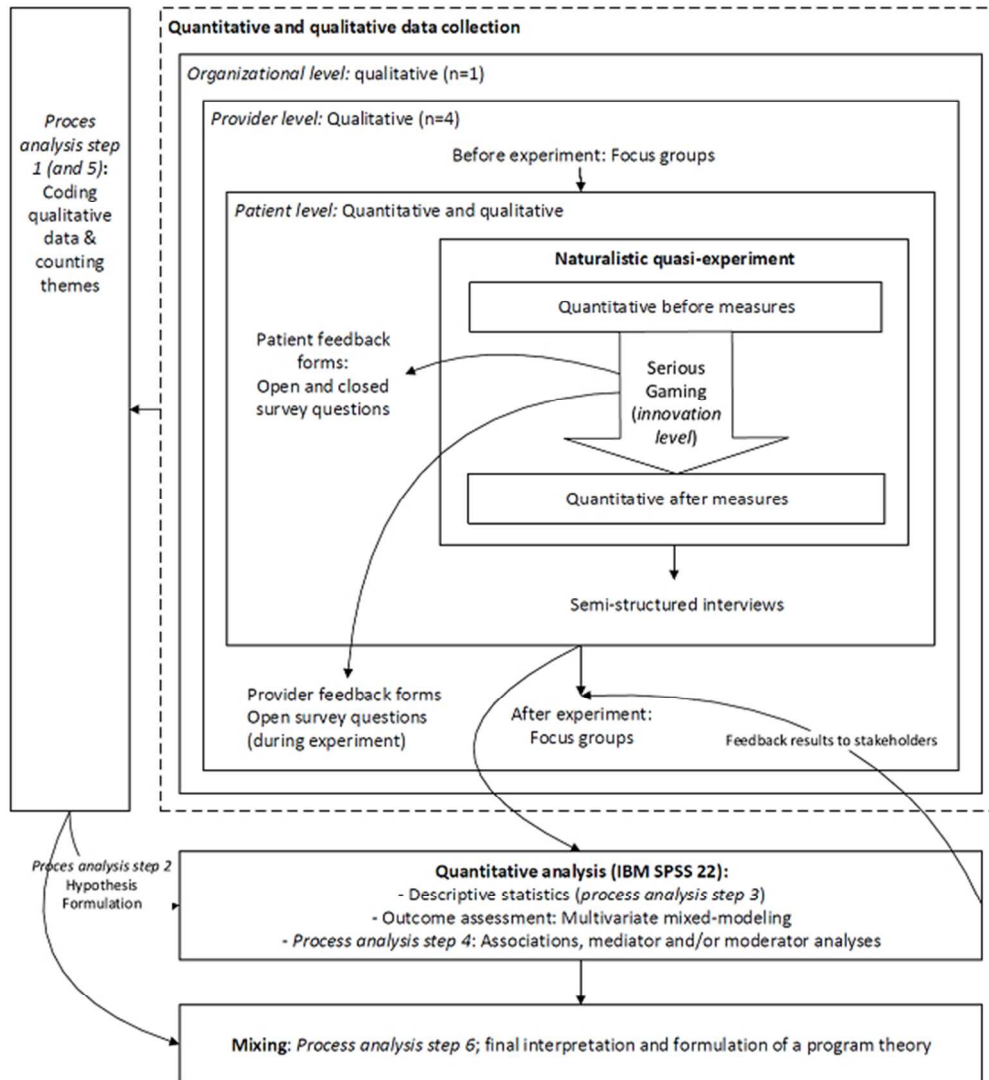

Figure 1: Overview of the Mixed-Methods design

173x188mm (96 x 96 DPI)

SUPPLEMENTARY FILE

Content:

1. Developer assumptions
2. User interface and screenshot examples
3. Information about the design rationale, functionality, validity proof (before outcome evaluation), and data protection

1. *Developer assumptions*

| Developer assumptions                                                                                                                                                                                                                                                                                                                                                                                                                                                                                                                                                                                                                                                                                                                                                                                                                                                                                                                                                                        | Related theory (interpretation)                                                                                                                                                                                                                                                                                                                                                                                                                                                                                                                                                                                                                                                                                                                                                               |
|----------------------------------------------------------------------------------------------------------------------------------------------------------------------------------------------------------------------------------------------------------------------------------------------------------------------------------------------------------------------------------------------------------------------------------------------------------------------------------------------------------------------------------------------------------------------------------------------------------------------------------------------------------------------------------------------------------------------------------------------------------------------------------------------------------------------------------------------------------------------------------------------------------------------------------------------------------------------------------------------|-----------------------------------------------------------------------------------------------------------------------------------------------------------------------------------------------------------------------------------------------------------------------------------------------------------------------------------------------------------------------------------------------------------------------------------------------------------------------------------------------------------------------------------------------------------------------------------------------------------------------------------------------------------------------------------------------------------------------------------------------------------------------------------------------|
| <p>The rehabilitation program is based on a (four dimensional) bio-psycho-social-spiritual treatment model in which Eastern and Western (medical) interventions are integrated. Interventions are aimed at improving ‘mobility of mind’, which is defined as: flexibility in accommodating 2 dynamic processes: 1) participation in private, social, and work roles, and 2) the ability to participate. Ability to participate depends on four interdependent aspects: symptoms (signals due to organ system injury or disturbance in shaping and controlling one’s life or ‘existence’), autonomy, perspective (‘to see one’s opportunities for finding meaning in life through inspiration’), and values. A reference for values is given by generosity, moral discipline, patience, enthusiastic perseverance, and mental stability. LAKA was designed to offer covert learning and skills training for enhancing a sense of self characterized by autonomy, values, and perspective.</p> | <p>This learning content may converge with and diverge from related concepts known in published scientific literature, including:</p> <ul style="list-style-type: none"> <li>- Categories of the International Classification of Functioning: specific (higher) mental functions, and activities and participation domains 6-9.<sup>1</sup></li> <li>- Coping flexibility under conditions of CP or FSS.<sup>2</sup></li> <li>- Eudaemonist process of psychological well-being.<sup>3</sup></li> <li>- Autonomously motivated pro-social behaviour.<sup>4 5</sup></li> <li>- (Neuro) psychological processes associated with similar practices (focused attention, open monitoring, and ethical enhancement) in general: self-awareness, self-regulation, and self-transcendence.</li> </ul> |
| <p>Improvement in mobility of mind is associated with better health outcomes after rehabilitation in patients with complex pain or fatigue (1<sup>st</sup> and 2<sup>nd</sup>).</p>                                                                                                                                                                                                                                                                                                                                                                                                                                                                                                                                                                                                                                                                                                                                                                                                          | <p>Learning content may converge with and diverge from similar plausible targets in non-pharmacological treatment for patients with CP or FSS: Internal control beliefs (+), avoidance (-), self-acceptance (+), mindfulness (+), values-based action (+), rumination (-), catastrophizing (-), negative (-) and positive mood and social interaction (+)<sup>2 6</sup></p>                                                                                                                                                                                                                                                                                                                                                                                                                   |
| <p>(Video) game mechanics can be leveraged to enhance learning through player’s self-awareness and intrinsic motivation. The game is of a relatively short duration, but promotes continued practice by any means outside the game. ‘Serious gaming sessions are planned after educational components (stress management and well-being, cognitive restructuring, and meditation) to enable complementary learning engagement and transfer’</p>                                                                                                                                                                                                                                                                                                                                                                                                                                                                                                                                              | <p>Plausible ways in which video game mechanics may affect the self in players (on different levels):</p> <ul style="list-style-type: none"> <li>- Self-efficacy theory: vicarious learning in health behaviour games.<sup>7</sup></li> <li>- Self-determination theory: gaming elicits representations of valued self-identities (through autonomy, competence, and relatedness).<sup>8</sup></li> <li>- Meta-cognitive processing is a likely consequence of, and characterizes interaction in the context of video game-play.<sup>9</sup></li> <li>- Distinctive features of serious gaming strengthen (moderate) effects of behavioural change content on outcomes<sup>7</sup></li> </ul>                                                                                                 |

## 2. User interface and screenshot examples

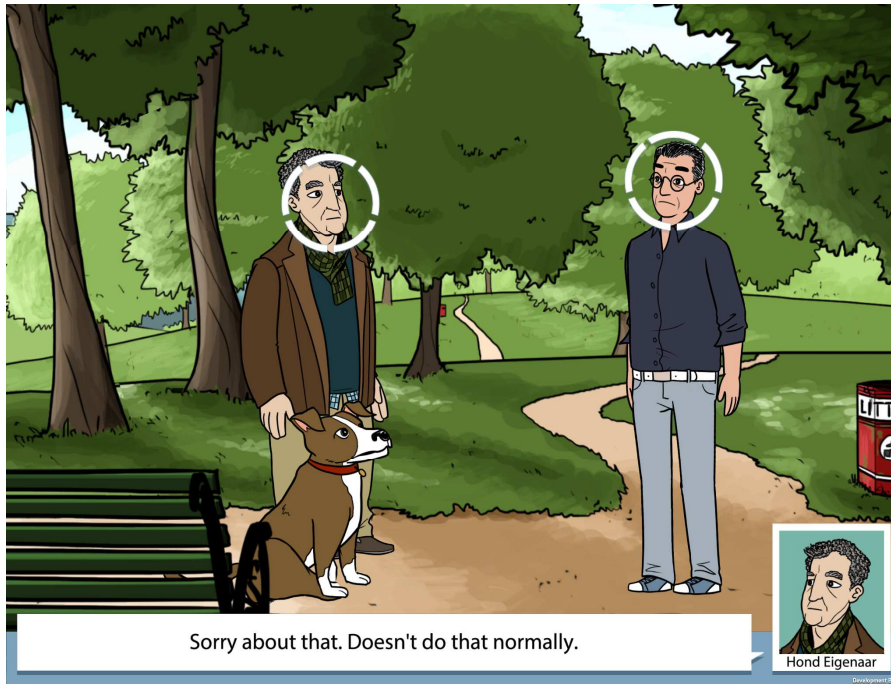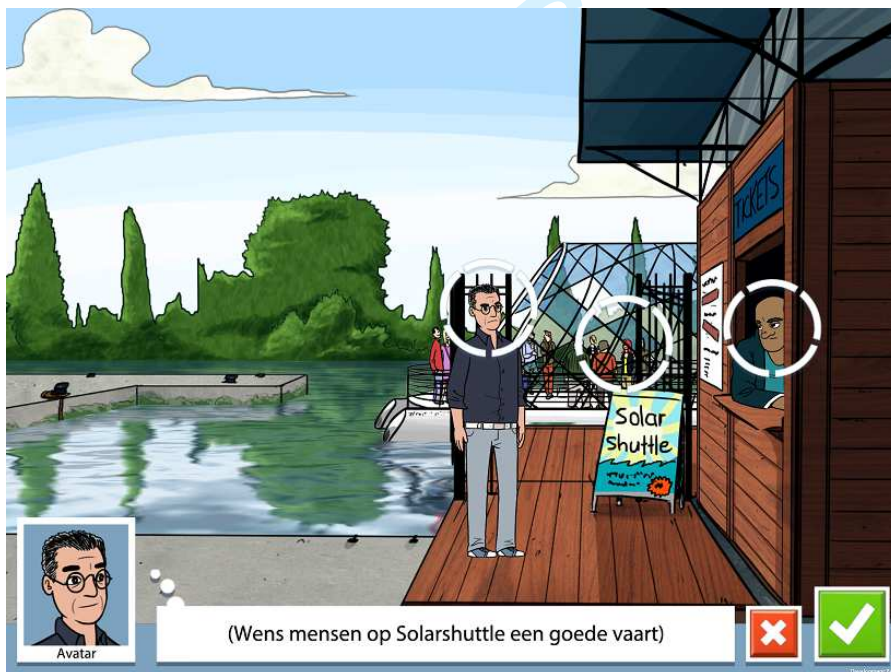

50  
51  
52  
53  
54  
55  
56  
57  
58  
59  
60

User interface (accessibility): The human-computer interface is designed for being easy to use (i.e. there is no time pressure). It is controllable by individuals with low computer skill. It involves making decisions by tapping on the screen (pre-selecting and confirmation). One of the casual mini-games involves usage of the tilting mechanism of the tablet pc, for steering an object. Progress is never dependent on gaming skills.

## 3. Information about the design rationale, functionality, validity proof (before outcome evaluation), and data protection

| Category                 | Item                            | Question                                                                                     | Answer                                                                                                                                                                                                                                                                                                       |
|--------------------------|---------------------------------|----------------------------------------------------------------------------------------------|--------------------------------------------------------------------------------------------------------------------------------------------------------------------------------------------------------------------------------------------------------------------------------------------------------------|
| <u>Game description</u>  |                                 |                                                                                              |                                                                                                                                                                                                                                                                                                              |
| Meta-data                | Operating system                | Operating systems of the game                                                                | Android, iOS, Windows, OS X                                                                                                                                                                                                                                                                                  |
|                          | Version                         | Version                                                                                      | Beta+                                                                                                                                                                                                                                                                                                        |
|                          | Web-link                        | Web-link                                                                                     | Yes*1                                                                                                                                                                                                                                                                                                        |
|                          | Project type                    | Commercial, non-commercial, other                                                            | Non-commercial                                                                                                                                                                                                                                                                                               |
|                          | Access                          | Public / restricted / other                                                                  | Restricted                                                                                                                                                                                                                                                                                                   |
|                          | Adjunct devices                 | Is an adjunct device needed?                                                                 | No adjunct device needed                                                                                                                                                                                                                                                                                     |
|                          | Development                     | Funding                                                                                      | How was development funded? Eg, funding agencies, investors                                                                                                                                                                                                                                                  |
| Sponsoring / Advertising | Advertisement policy            | Is the game free of commercial pop-ups?                                                      | Yes                                                                                                                                                                                                                                                                                                          |
|                          |                                 | If not, what is advertised?                                                                  | NA                                                                                                                                                                                                                                                                                                           |
|                          | Sources of income               | Are there sources of income within the game?                                                 | No                                                                                                                                                                                                                                                                                                           |
|                          | Sources of income outside game  | What are the sources of income of the owner/distributor?                                     | The owner and distributor (Ciran) is a foundation providing outpatient rehabilitation care covered by health insurance.                                                                                                                                                                                      |
|                          | Potential conflicts of interest | Affiliations                                                                                 | What affiliations do the publishers have that could influence content or user group?                                                                                                                                                                                                                         |
| Conflicts of interest    |                                 | What interests do the publishers have that could influence the game's content or user group? | Content and user groups are based on the objective of Ciran to improve outpatient rehabilitation for patients with complex chronic pain and/or fatigue. The primary (tentative) purpose of game design is the improvement of (independent) engagement with learning content during a rehabilitation program. |
| Disclosure               |                                 | Are conflicts of interest disclosed?                                                         | Yes                                                                                                                                                                                                                                                                                                          |
| <u>Rationale</u>         |                                 |                                                                                              |                                                                                                                                                                                                                                                                                                              |
| Purpose                  | Goal or purpose                 | What is (are) the purpose(s) of the game?                                                    | To facilitate learning and promote practice for 'mobility of mind' (see developer assumptions) to support recovery in patients with complex chronic pain and/or fatigue.                                                                                                                                     |
|                          | Disclosure                      | Is (are) the purpose(s) disclosed to users?                                                  | Yes                                                                                                                                                                                                                                                                                                          |
| Medical device           | Medical device                  | Is the serious game a medical device, or not?                                                | Not                                                                                                                                                                                                                                                                                                          |
|                          | Class                           | If yes, which class?                                                                         | NA                                                                                                                                                                                                                                                                                                           |
|                          | Approval by legal bodies        | If yes, does it comply with the necessary requirements (FDA-approval, CE-mark?).             | NA                                                                                                                                                                                                                                                                                                           |
| User group               | Specific user groups            | For each user group: disease/condition                                                       | Patients with chronic pain and fatigue, and problems in multiple (other) domains of functioning.                                                                                                                                                                                                             |

1  
2  
3  
4  
5  
6  
7  
8  
9  
10  
11  
12  
13  
14  
15  
16  
17  
18  
19  
20  
21  
22  
23  
24  
25  
26  
27  
28  
29  
30  
31  
32  
33  
34  
35  
36  
37  
38  
39  
40  
41  
42  
43  
44  
45  
46  
47  
48  
49

|         | Description                     | Please specify gender, age (range), and other relevant descriptive items.      | See inclusion and exclusion criteria as listed in the main body of the article.                                                                                                                                                                                                                                                                                                                                                                                                                                                                                                                                                                                                                                                                                                                                                                                                                                                                                                                                                                                                                                                                                                                                                                                                                                                                                                                                                                                                                                                                                                                                                                                                                              |
|---------|---------------------------------|--------------------------------------------------------------------------------|--------------------------------------------------------------------------------------------------------------------------------------------------------------------------------------------------------------------------------------------------------------------------------------------------------------------------------------------------------------------------------------------------------------------------------------------------------------------------------------------------------------------------------------------------------------------------------------------------------------------------------------------------------------------------------------------------------------------------------------------------------------------------------------------------------------------------------------------------------------------------------------------------------------------------------------------------------------------------------------------------------------------------------------------------------------------------------------------------------------------------------------------------------------------------------------------------------------------------------------------------------------------------------------------------------------------------------------------------------------------------------------------------------------------------------------------------------------------------------------------------------------------------------------------------------------------------------------------------------------------------------------------------------------------------------------------------------------|
|         | Limits                          | Are there age limits, or other limits?                                         | According to PEGI classification, the content of the game was found suitable for people who are at least 12 years of age, because it contains some events of mild swearing.                                                                                                                                                                                                                                                                                                                                                                                                                                                                                                                                                                                                                                                                                                                                                                                                                                                                                                                                                                                                                                                                                                                                                                                                                                                                                                                                                                                                                                                                                                                                  |
|         | Disclosure                      | Is the intended user group disclosed?                                          | Yes                                                                                                                                                                                                                                                                                                                                                                                                                                                                                                                                                                                                                                                                                                                                                                                                                                                                                                                                                                                                                                                                                                                                                                                                                                                                                                                                                                                                                                                                                                                                                                                                                                                                                                          |
| Setting | Patient care                    | Is the game used in patient care?                                              | Yes                                                                                                                                                                                                                                                                                                                                                                                                                                                                                                                                                                                                                                                                                                                                                                                                                                                                                                                                                                                                                                                                                                                                                                                                                                                                                                                                                                                                                                                                                                                                                                                                                                                                                                          |
|         | Training courses                | Is the game used in training courses or - curricula?                           | No                                                                                                                                                                                                                                                                                                                                                                                                                                                                                                                                                                                                                                                                                                                                                                                                                                                                                                                                                                                                                                                                                                                                                                                                                                                                                                                                                                                                                                                                                                                                                                                                                                                                                                           |
|         | SCORM compliancy                | If used in training courses or curricula, is the serious game SCORM-compliant? | NA                                                                                                                                                                                                                                                                                                                                                                                                                                                                                                                                                                                                                                                                                                                                                                                                                                                                                                                                                                                                                                                                                                                                                                                                                                                                                                                                                                                                                                                                                                                                                                                                                                                                                                           |
|         | <u>Functionality</u>            |                                                                                |                                                                                                                                                                                                                                                                                                                                                                                                                                                                                                                                                                                                                                                                                                                                                                                                                                                                                                                                                                                                                                                                                                                                                                                                                                                                                                                                                                                                                                                                                                                                                                                                                                                                                                              |
|         | Purposes / didactic features    | For every purpose of the game:                                                 |                                                                                                                                                                                                                                                                                                                                                                                                                                                                                                                                                                                                                                                                                                                                                                                                                                                                                                                                                                                                                                                                                                                                                                                                                                                                                                                                                                                                                                                                                                                                                                                                                                                                                                              |
|         | Learning or behavioural goals   | What content will the player learn?                                            | Learning content is based on a reference set of values that manifest in (pro-social) thought and behaviour. These values correspond with the 'perfections' of Mahayana Buddhism. Learning this content is, for research purposes, interpreted as a process of psychological well-being through self-awareness, self-regulation, and self-transcendence (see developer assumptions).                                                                                                                                                                                                                                                                                                                                                                                                                                                                                                                                                                                                                                                                                                                                                                                                                                                                                                                                                                                                                                                                                                                                                                                                                                                                                                                          |
|         | Relation learning and game play | How does the learning content relate to the game play?                         | <p>Players are supported in imagining how valued states (or 'selves') are attainable when going on a trip around the world (as a metaphor for private, social, or work participation). Before the game starts, players are explicitly instructed to identify with an Avatar (of their chosen gender and name). It is stated that Avatar choices reflect you as a player. In an introductory cut-scene, this Avatar meets a non-playing character (NPC), named LAKA. The personal Avatar is introduced as someone who experienced deterioration in physical and social domains of functioning, and is determined to improve his/her life. Then, LAKA challenges the Avatar 'to cope well with others' on a trip to 4 destinations (London, Turkey, Asia, and Africa). Meanwhile, most of the mechanics of LAKA enable (virtual) exploration and affirmation of values by selecting action plans for the personal Avatar. At each travel destination, the Avatar faces 4 encounters with NPC's under various circumstances. These encounters are designed as complex interactions between Avatar actions and unpredictable responses of the NPC/environment (rendering variety in cultural settings). For each Avatar action, players select an action plan out of 5 programmed options for physical acting, saying, and/or avoiding. The action plans are modelled by their level of correspondence with values for a given situation.</p> <p>After visiting a destination (after 4 encounters), LAKA appears and asks the Avatar to provide a self-rating of his/her performance, provides feedback on chosen action plans (by giving a certain number of puzzle pieces), and feeds back how well Avatar</p> |



|                    |                                             |                                                                                                                 |                                                                                                                                                                                                                                                                                                                                                                                                                                                                                                                                                                                                                                                                                                                                                                                                                                                                                                                                |
|--------------------|---------------------------------------------|-----------------------------------------------------------------------------------------------------------------|--------------------------------------------------------------------------------------------------------------------------------------------------------------------------------------------------------------------------------------------------------------------------------------------------------------------------------------------------------------------------------------------------------------------------------------------------------------------------------------------------------------------------------------------------------------------------------------------------------------------------------------------------------------------------------------------------------------------------------------------------------------------------------------------------------------------------------------------------------------------------------------------------------------------------------|
|                    |                                             |                                                                                                                 | <p>Self-ratings and LAKA ratings correspond (by providing additional puzzle pieces). Finally, LAKA delivers focused attention and open monitoring exercises (explaining and illustrating how to practice meditation, prompting practice, providing a means for stress management).</p> <p>Learning elements are interspersed with short (casual) action and puzzle games, images, and information associated with the location of the Avatar. These features promote enjoyment by varying game play and rewarding curiosity, and can be skipped if preferred.</p>                                                                                                                                                                                                                                                                                                                                                              |
|                    | Instruction                                 | What intervention leads to the learning transition (eg, tutorial, instructions (in-game))                       | Besides prompting identification with the Avatar, and adding feedback by LAKA as a form of in-game debriefing, face-to-face debriefings by care providers are offered to improve the transition from game play to learning for daily life improvements.                                                                                                                                                                                                                                                                                                                                                                                                                                                                                                                                                                                                                                                                        |
|                    | Assessment (progress) in game               | Through which parameters is progress in the game measured?                                                      | Number of encounters completed (progress does not depend on player learning level), but feedback is provided on actions chosen by players.                                                                                                                                                                                                                                                                                                                                                                                                                                                                                                                                                                                                                                                                                                                                                                                     |
|                    | Assessment parameters                       | Which parameters are to designers' opinion indicative for measuring learning effects?                           | Primary health outcomes (i.e. pain, fatigue) may be an indirect result of learning. Parameters that may indicate a learning effect more directly may be plausible mediators of outcome improvement after behavioural interventions in CP or FSS patients (see developer assumptions). Parameters of game play may also directly reflect learning effects: 1) LAKA assessments may reflect whether a patient thinks and acts in accordance with values, 2) the level of correspondence between self-assessment and LAKA assessment may contain information about the extent to which the player understands what sort of thinking and behaviour relates to psychological well-being.                                                                                                                                                                                                                                            |
| Content Management | Content Management system                   | Is the Content Management System restricted to specified persons or institutions?                               | Yes                                                                                                                                                                                                                                                                                                                                                                                                                                                                                                                                                                                                                                                                                                                                                                                                                                                                                                                            |
|                    | User uploaded content                       | If no, are users allowed to upload their own content?                                                           | NA                                                                                                                                                                                                                                                                                                                                                                                                                                                                                                                                                                                                                                                                                                                                                                                                                                                                                                                             |
|                    | Content monitoring                          | How is uploaded content checked?                                                                                | NA                                                                                                                                                                                                                                                                                                                                                                                                                                                                                                                                                                                                                                                                                                                                                                                                                                                                                                                             |
|                    | Restrictions and limits of the serious game | Please describe restrictions and limits of the serious game. What content on the learning goals is not covered? | <p>The game itself does not contain detailed explicit knowledge on relationships between learning content and health outcomes. Complementary delivery modes of rehabilitation (i.e. handbooks, group therapy sessions) serve this purpose. An argument for withholding highly explicit feedback is that the adequacy of action plans (coping) is context dependent. The game enables safe exploration of options for (non-automatic) responding to contextual clues. Consequently, the game triggers reflection by leaving some ambiguity about what might be the 'right' sort of behaviour.</p> <p>This ambiguity might diminish levels of acceptance/playability (perceptions on feedback or challenge) in some players. Professional support may partially compensate this issue when embedding the game within regular treatment. The game was found to be engaging enough to play ones or twice (2-5 hours), which is</p> |



|    |                                 |                                 |                                                                                                                                                             |
|----|---------------------------------|---------------------------------|-------------------------------------------------------------------------------------------------------------------------------------------------------------|
|    |                                 |                                 | not expected to be enough for moderate or strong average effects on player behaviour and health outcomes.                                                   |
| 1  | Potentially undesirable effects | Potentially undesirable effects | What potential undesirable effects could the game have?                                                                                                     |
| 2  |                                 | Disclosure                      | Are such potential undesirable effects disclosed to the user?                                                                                               |
| 3  |                                 | Measures taken                  | What measures are taken to prevent potential undesirable effects?                                                                                           |
| 4  |                                 |                                 | Based on the result of feasibility study, we expect no undesirable effects. During the present evaluations, undesirable effects will be investigated again. |
| 5  |                                 |                                 |                                                                                                                                                             |
| 6  |                                 |                                 |                                                                                                                                                             |
| 7  |                                 |                                 |                                                                                                                                                             |
| 8  |                                 |                                 |                                                                                                                                                             |
| 9  |                                 |                                 |                                                                                                                                                             |
| 10 |                                 |                                 |                                                                                                                                                             |
| 11 |                                 |                                 |                                                                                                                                                             |
| 12 |                                 |                                 |                                                                                                                                                             |
| 13 |                                 |                                 |                                                                                                                                                             |
| 14 |                                 |                                 |                                                                                                                                                             |
| 15 |                                 |                                 |                                                                                                                                                             |
| 16 |                                 |                                 |                                                                                                                                                             |
| 17 |                                 |                                 |                                                                                                                                                             |
| 18 |                                 |                                 |                                                                                                                                                             |
| 19 |                                 |                                 |                                                                                                                                                             |
| 20 |                                 |                                 |                                                                                                                                                             |
| 21 |                                 |                                 |                                                                                                                                                             |
| 22 |                                 |                                 |                                                                                                                                                             |
| 23 |                                 |                                 |                                                                                                                                                             |
| 24 |                                 |                                 |                                                                                                                                                             |
| 25 |                                 |                                 |                                                                                                                                                             |
| 26 |                                 |                                 |                                                                                                                                                             |
| 27 |                                 |                                 |                                                                                                                                                             |
| 28 |                                 |                                 |                                                                                                                                                             |
| 29 |                                 |                                 |                                                                                                                                                             |
| 30 |                                 |                                 |                                                                                                                                                             |
| 31 |                                 |                                 |                                                                                                                                                             |
| 32 |                                 |                                 |                                                                                                                                                             |
| 33 |                                 |                                 |                                                                                                                                                             |
| 34 |                                 |                                 |                                                                                                                                                             |
| 35 |                                 |                                 |                                                                                                                                                             |
| 36 |                                 |                                 |                                                                                                                                                             |
| 37 |                                 |                                 |                                                                                                                                                             |
| 38 |                                 |                                 |                                                                                                                                                             |
| 39 |                                 |                                 |                                                                                                                                                             |
| 40 |                                 |                                 |                                                                                                                                                             |
| 41 |                                 |                                 |                                                                                                                                                             |
| 42 |                                 |                                 |                                                                                                                                                             |
| 43 |                                 |                                 |                                                                                                                                                             |
| 44 |                                 |                                 |                                                                                                                                                             |
| 45 |                                 |                                 |                                                                                                                                                             |
| 46 |                                 |                                 |                                                                                                                                                             |
| 47 |                                 |                                 |                                                                                                                                                             |
| 48 |                                 |                                 |                                                                                                                                                             |
| 49 |                                 |                                 |                                                                                                                                                             |

|                             |                        |                                                                                                       |                                                                                                                                                                                                                                                                                                                                                                                                                                                                                                                                                                                                                                                                                                                                                                                                                                                                                                                                                                                                                      |
|-----------------------------|------------------------|-------------------------------------------------------------------------------------------------------|----------------------------------------------------------------------------------------------------------------------------------------------------------------------------------------------------------------------------------------------------------------------------------------------------------------------------------------------------------------------------------------------------------------------------------------------------------------------------------------------------------------------------------------------------------------------------------------------------------------------------------------------------------------------------------------------------------------------------------------------------------------------------------------------------------------------------------------------------------------------------------------------------------------------------------------------------------------------------------------------------------------------|
|                             | Content validity       | How is its content validated to be complete, correct, and nothing but the intended medical construct? | A structured self-report questionnaire to assess thought and behaviour in correspondence with values as defined in the teaching model of the 6 perfections was created by Ciran in collaboration with the Yeunten Ling institute (Belgium). A validation report on this test was assessed by an independent Dutch commission for test affairs (COTAN). It was found that questionnaire scores have good reliability, and are strongly correlated with psychological well-being (as expected). Game scenarios were constructed by a professional writer who was familiar with the model and made explicit references to questionnaire items within screen plays for content validity checks. The quality of scenario's and operationalization was monitored under supervision of a creator of the test.                                                                                                                                                                                                               |
|                             | Construct validity     | Is the game able to measure differences in skills it intends to measure?                              | Research in progress                                                                                                                                                                                                                                                                                                                                                                                                                                                                                                                                                                                                                                                                                                                                                                                                                                                                                                                                                                                                 |
|                             | Concurrent validity    | How does learning outcome compare to other methods assessing the same medical construct?              | Concurrent validity was studied using unreported data that were collected in the pilot phase (n=67 patients). A preliminary measure of game score was calculated as the average of all chosen action plans (the quality of each action plan is scaled ordinal; 0, 1, 2, 3, or 4). Performance was assessed by summing the scores for 5 scales corresponding with the behavioural domains of the values questionnaire (generosity, moral discipline, patience, enthusiastic perseverance, and mental stability). Pearson correlations between game scores and the behavioural domain of the values questionnaire were found to be significant, and of a small to moderate size. Self-assessed values measured at baseline (measured within a month before playing the game) correlated .29 with game scores. Values measured post-intervention (1-2 months after playing the game) correlated .39 with game scores. This agreement is encouraging given the differences in how to construct indicators were measured. |
|                             | Predictive validity    | Does playing the game predict skills improvement in real life?                                        | Research in progress                                                                                                                                                                                                                                                                                                                                                                                                                                                                                                                                                                                                                                                                                                                                                                                                                                                                                                                                                                                                 |
|                             | <u>Data protection</u> |                                                                                                       |                                                                                                                                                                                                                                                                                                                                                                                                                                                                                                                                                                                                                                                                                                                                                                                                                                                                                                                                                                                                                      |
| Data protection and privacy | Data processing        | How is data collected in the serious game?                                                            | The game can only be accessed by clients of Ciran by logging in with their treatment ID number and self-chosen password. Log-data are encrypted, send over the internet, and stored by Ciran to save proceedings and enable feedback of game scores. No patient-specific data are stored on devices.                                                                                                                                                                                                                                                                                                                                                                                                                                                                                                                                                                                                                                                                                                                 |
|                             | Patient privacy        | Are patient-specific data stored in the game?                                                         | Data are recorded by Ciran includes IP addresses, name given to the Avatar (no name, or alias is possible), which could be used to identify users.                                                                                                                                                                                                                                                                                                                                                                                                                                                                                                                                                                                                                                                                                                                                                                                                                                                                   |

|  |                            |                                                                                             |                                                                                                                                                                                                                                                                                                                                                                                                                                                                                                                                                                                                                                                                                                            |
|--|----------------------------|---------------------------------------------------------------------------------------------|------------------------------------------------------------------------------------------------------------------------------------------------------------------------------------------------------------------------------------------------------------------------------------------------------------------------------------------------------------------------------------------------------------------------------------------------------------------------------------------------------------------------------------------------------------------------------------------------------------------------------------------------------------------------------------------------------------|
|  |                            | If yes, are patient informed consent criteria met according to relevant national standards? | Yes. All clients at Ciran are informed before the start of their treatment about the use of a digital tracking system for creating and maintaining a patient record, and about their rights for managing their personal records. Therefore, game data concern progress of the treatment and can only be used for scientific research under strict conditions. Therefore, a research protocol describing the codified processing of log-data (thus not including potentially patient specific IP addresses and Avatar names) for the evaluation of LAKA was approved by the ethical committee of Tilburg School of Social and Behavioural Sciences. Medical ethics review is not required for the research. |
|  | Data ownership             | Who owns and stores the data resulting from play?                                           | Ciran                                                                                                                                                                                                                                                                                                                                                                                                                                                                                                                                                                                                                                                                                                      |
|  | Data storage period        | During what period are data stored?                                                         | In accordance with the legal storage of medical records (15 years)                                                                                                                                                                                                                                                                                                                                                                                                                                                                                                                                                                                                                                         |
|  | Data removal               | Can the user delete data temporarily and/or permanently?                                    | Yes                                                                                                                                                                                                                                                                                                                                                                                                                                                                                                                                                                                                                                                                                                        |
|  | Data storage security      | Is the data storage secured in conformity with laws of the countries stated above?          | Yes                                                                                                                                                                                                                                                                                                                                                                                                                                                                                                                                                                                                                                                                                                        |
|  | Data transmission security | Is the data transmission secured in conformity with laws of the countries stated above?     | Yes                                                                                                                                                                                                                                                                                                                                                                                                                                                                                                                                                                                                                                                                                                        |
|  | Disclosure                 | Are all items on "data protection" disclosed to the user?                                   | Yes. All items are disclosed to patients before starting their treatment. Specific information on the storage of game data for progress tracking and feedback have not been highlighted in the consent procedure.                                                                                                                                                                                                                                                                                                                                                                                                                                                                                          |

\*1 Prototype trailer (English): <http://www.ciran.nl/laka/lakaEnglish.php>; Trailer of the experimental version of the game (Dutch): <http://www.ciran.nl/laka/lakaNed.php>

\*2 <https://www.ciran.nl/>

\*3 Vugts MA, Joosen MC, van Bergen AH, et al. Feasibility of Applied Gaming During Interdisciplinary Rehabilitation for Patients With Complex Chronic Pain and Fatigue Complaints: A Mixed-Methods Study. *JMIR serious games* 2016;**4**(1).

1. Organization WH. *International Classification of Functioning, Disability and Health: ICF*: World Health Organization, 2001.
2. McCracken LM, Morley S. The psychological flexibility model: A basis for integration and progress in psychological approaches to chronic pain management. *The Journal of Pain* 2014;**15**(3):221-34.
3. Ryff CD, Singer BH. Know thyself and become what you are: A eudaimonic approach to psychological well-being. *Journal of happiness studies* 2008;**9**(1):13-39.
4. Martela F, Ryan RM. Prosocial behavior increases well-being and vitality even without contact with the beneficiary: Causal and behavioral evidence. *Motivation and Emotion* 2016;**40**(3):351-57.
5. Weinstein N, Ryan RM. When helping helps: autonomous motivation for prosocial behavior and its influence on well-being for the helper and recipient. *Journal of personality and social psychology* 2010;**98**(2):222.

6. Zautra AJ, Johnson LM, Davis MC. Positive affect as a source of resilience for women in chronic pain. *Journal of consulting and clinical psychology* 2005;**73**(2):212.
7. Baranowski T, Buday R, Thompson DI, et al. Playing for real: video games and stories for health-related behavior change. *American journal of preventive medicine* 2008;**34**(1):74-82. e10.
8. Przybylski AK, Weinstein N, Murayama K, et al. The ideal self at play the appeal of video games that let you be all you can be. *Psychological science* 2012;**23**(1):69-76.
9. Kim B, Park H, Baek Y. Not just fun, but serious strategies: Using meta-cognitive strategies in game-based learning. *Computers & Education* 2009;**52**(4):800-10.

For peer review only
